# Supplementary material for: Homochiral imidazolium-based dicarboxylate silver(i) compounds: synthesis, characterisation and antimicrobial properties
Source: Royal Society of Chemistry journal article supplement (doi:10.1039/d1dt04213k), 2022-01-01
Supplement: d1dt04213k1.pdf [file d1dt04213k1.pdf]

## Homochiral imidazolium-based dicarboxylate silver(I) compounds: synthesis, characterisation and antimicrobial properties.

Carlos J. Carrasco, Francisco Montilla,\* Eleuterio Álvarez, Agustín Galindo, María Pérez-Aranda, Eloísa Pajuelo, and Ana Alcudia\*

### ELECTRONIC SUPPLEMENTARY INFORMATION

**Figure S1.**  $^1\text{H}$  and  $^{13}\text{C}\{^1\text{H}\}$  NMR, IR and HR-ESI-MS spectra of complex **2a**.

**Figure S2.**  $^1\text{H}$  and  $^{13}\text{C}\{^1\text{H}\}$  NMR, IR and HR-ESI-MS spectra of complexes **2b** and **2b'**.

**Figure S3.**  $^1\text{H}$  and  $^{13}\text{C}\{^1\text{H}\}$  NMR, IR and HR-ESI-MS spectra of complexes **2c** and **2c'**.

**Figure S4.**  $^1\text{H}$  and  $^{13}\text{C}\{^1\text{H}\}$  NMR, IR and HR-ESI-MS spectra of complex **2d**.

**Figure S5.**  $^1\text{H}$  and  $^{13}\text{C}\{^1\text{H}\}$  NMR, IR and HR-ESI-MS spectra of complex **2e**.

**Figure S6.**  $^1\text{H}$  and  $^{13}\text{C}\{^1\text{H}\}$  NMR, IR and HR-ESI-MS spectra of complex **2f**.

**Figure S7.** Views of the coordination polymer of  $\{\text{Ag}[(S,S)\text{-L}^{\text{iPr}}]\}_n$  (**2c**): (a), along  $a$  axis (b) along  $c$  axis.

**Figure S8.** (a) Asymmetric unit of  $\{\text{Ag}[(R,R)\text{-L}^{\text{iPr}}]\}_n$  (**2c'**) and views of the coordination polymer: (b), along  $a$  axis (c) along  $c$  axis.

**Figure S9.** View of the 3D architecture of compounds **2c** and **2c'**, with three 1D coordination polymers along  $a$  axis (three unit cells).

**Figure S10.** DFT profile of the mechanism for the carbene intermediate formation.

**Figure S11.** DFT profile of the mechanism for the H-D exchange with  $\text{D}_2\text{O}$  mediated by silver(I).

**Figure S12.** DFT profile of the deuteration mechanism of the  $\text{C}^2\text{-H}$  position.

**Figure S13.** Relative MDA quantification for complex **2c** (control is considered as 100%) for *E. coli* (in blue) and *P. aeruginosa* (in red) assays. Control ranges are 0-0.2 nMol/mg for *E.coli* and 0.1-0.27 nMol/mg for *P. aeruginosa*.

**Figure S14.** Relative MDA quantification for complex **2c'** (control is considered as 100%) for *E. coli* (in blue) and *P. aeruginosa* (in red) assays. Control ranges are 0-0.2 nMol/mg for *E.coli* and 0.1-0.27 nMol/mg for *P. aeruginosa*.

**Figure S15.** Evaluation of biofilm formation of *E. coli* (top) and *P. aeruginosa* (bottom) exposed to complex **2c** (A: control, B: MIC, C: MBC).

**Fig. S16.** CD spectra of the enantiomeric pairs **2b-2b'** (a) and **2c-2c'** (b).

**Figure S17.**  $^1\text{H}$ -DOSY spectrum (500 MHz, 25 °C,  $\text{H}_2\text{O}$ ) of compounds **1a** (a), **2a** (b) and  $\{\text{Na}[\text{L}^{\text{H}}]\}_n$  (c).

**Table S1.** Conductivity measurements ( $\mu\text{s}/\text{cm}$ ) of compounds **1** and **2** at 25°C ( $10^{-3}\text{M}$ ) in mili-Q water.

**Table S2.** Crystal data and structure refinement for compounds **2c**, **2c'** and **2e** from single-crystal X-ray crystallography.

**Table S3.** Selected bond lengths ( $\text{\AA}$ ) and angles ( $^\circ$ ) for complexes **2c**, **2c'** and **2e**.<sup>a</sup>

**Table S4.** Coordinates of the optimised compounds of the H-D exchange mechanism.

**Figure S1.**  $^1\text{H}$  and  $^{13}\text{C}\{^1\text{H}\}$  NMR, IR and HR-ESI-MS spectra of complex **2a**.

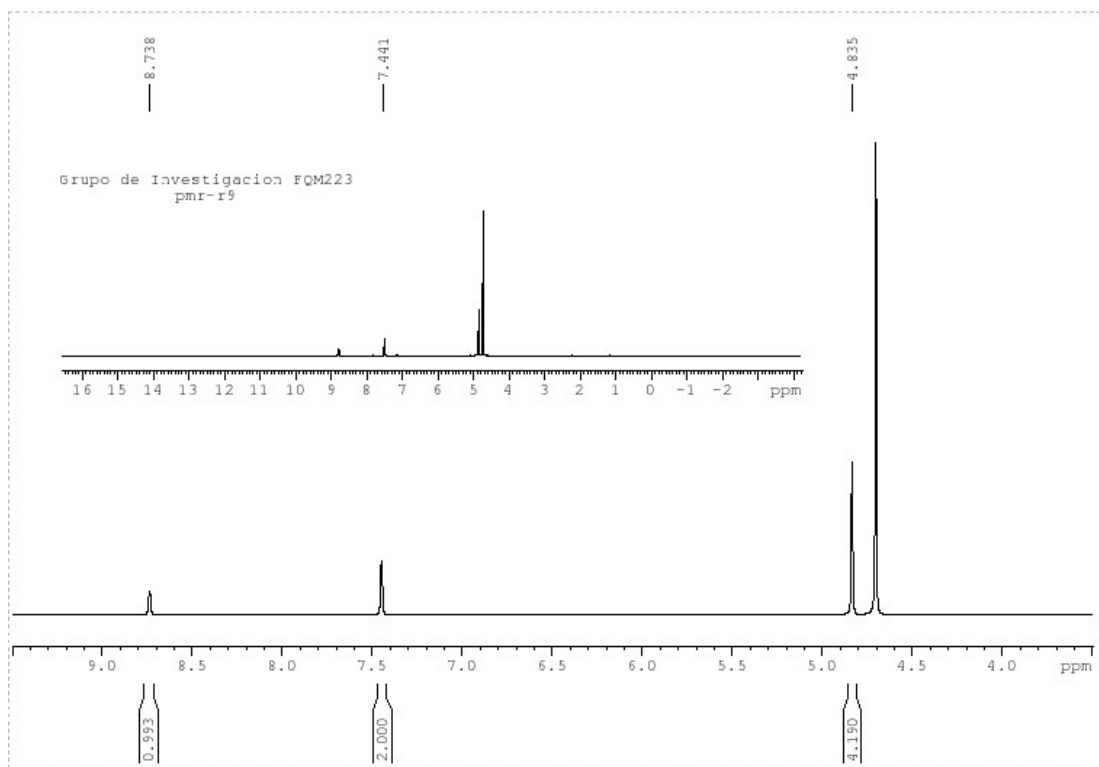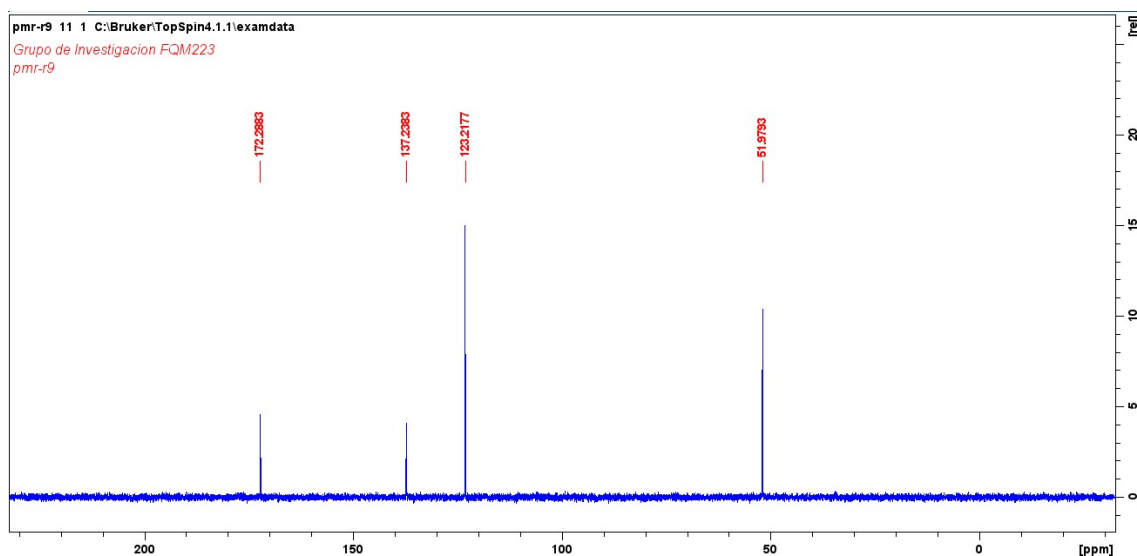

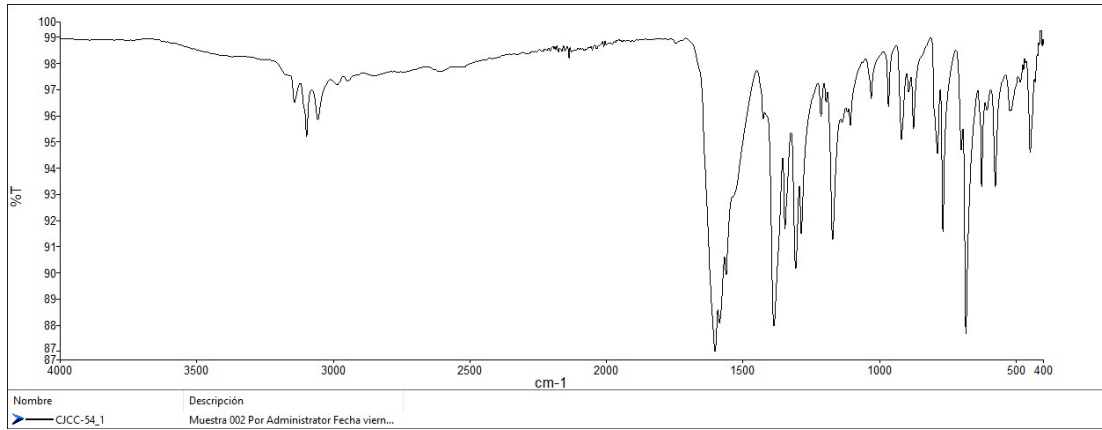

211119\_CJCC54 11/19/21 12:20:20 CJCC-54 PM=290 C7H8AgN2O4+

211119\_CJCC54 #37-73 RT: 0.200.37 AV: 37 NL: 1.12E4  
T: FTMS - c ESI Full ms [60.00.900.00]

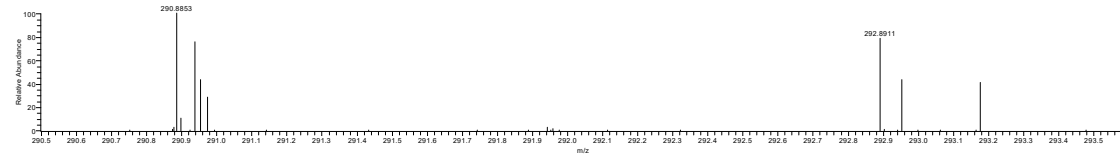

211119\_CJCC54 #36-72 RT: 0.190.36 AV: 37 SB: 55 2.36-2.70 NL: 1.12E4  
T: FTMS - c ESI Full ms [60.00.900.00]

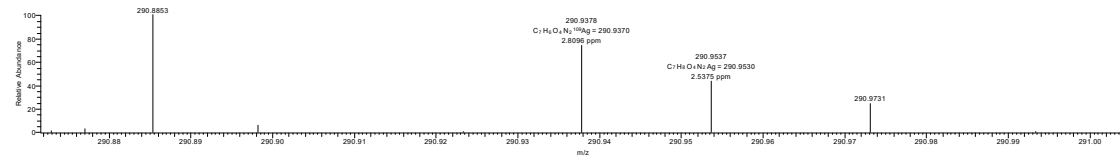

211119\_CJCC54 #37-73 RT: 0.200.37 AV: 37 SB: 55 2.36-2.70 NL: 8.70E3  
T: FTMS - c ESI Full ms [60.00.900.00]

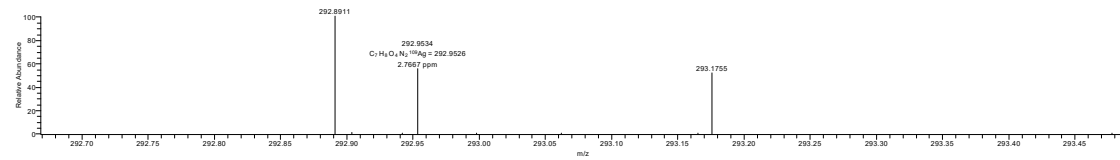

**Figure S2.**  $^1\text{H}$  and  $^{13}\text{C}\{^1\text{H}\}$  NMR, IR and HR-ESI-MS spectra of complexes **2b** and **2b'**.

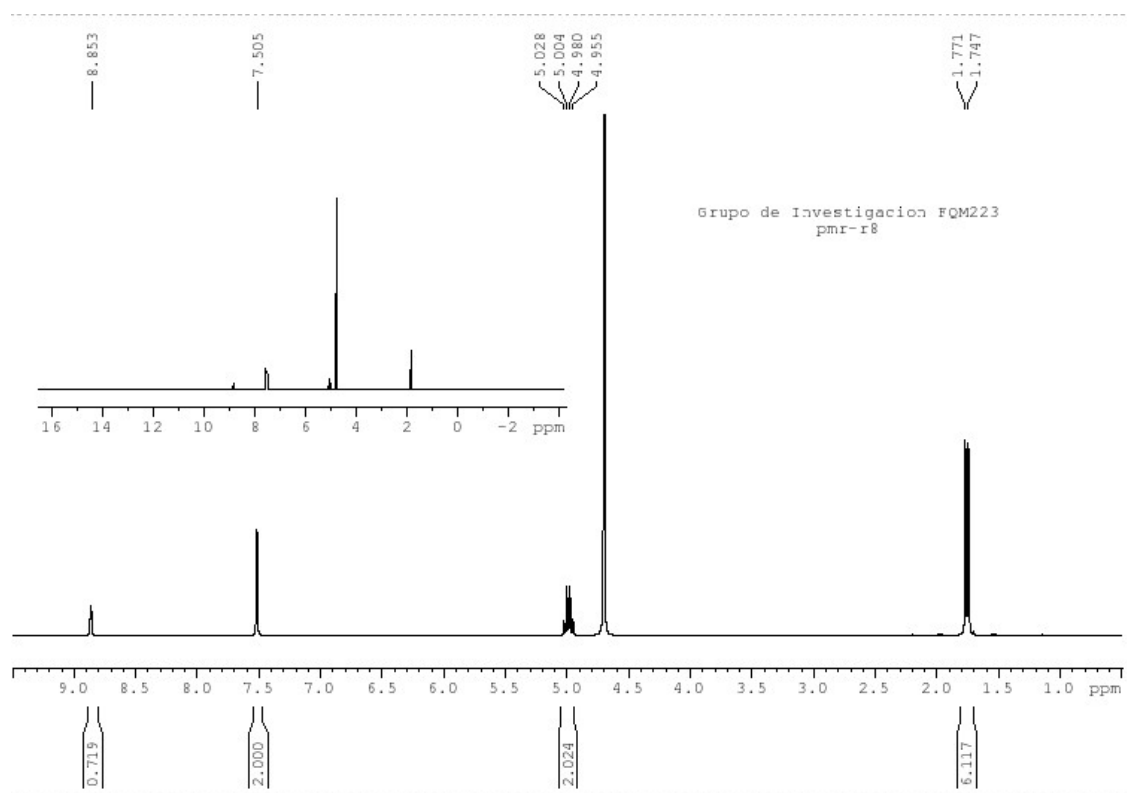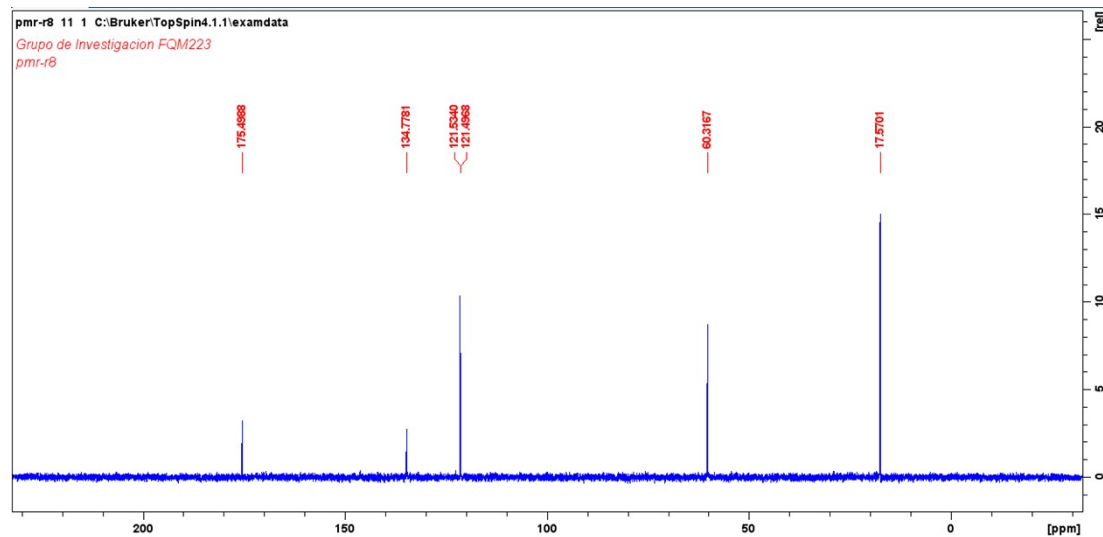

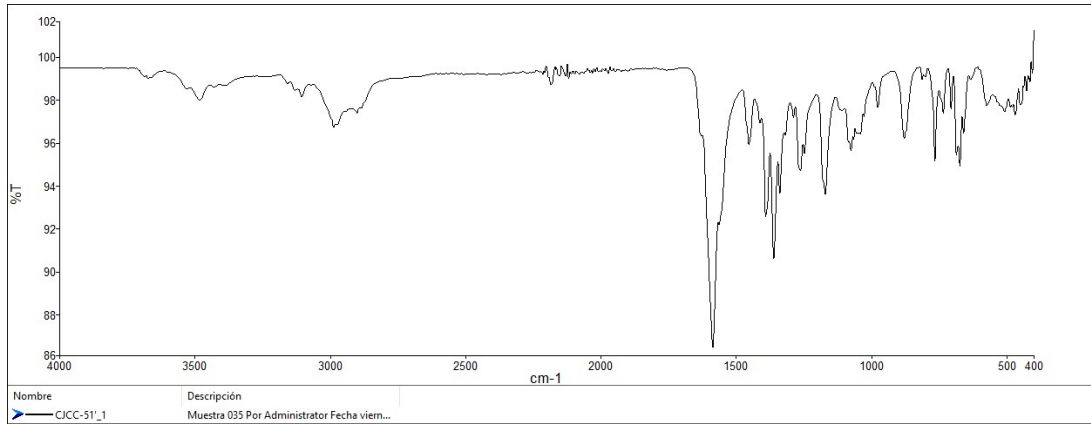

211119\_CJCC51' 11/19/21 12:25:28 C/JCC-51' PM=318 C9H12AgN2O4+

211119\_CJCC51'#36-61 RT: 0.19-0.30 AV: 26 SB: 1 3.00 NL: 1.87E4  
 T: FTMS - c ESI Full ms [60.00-900.00]

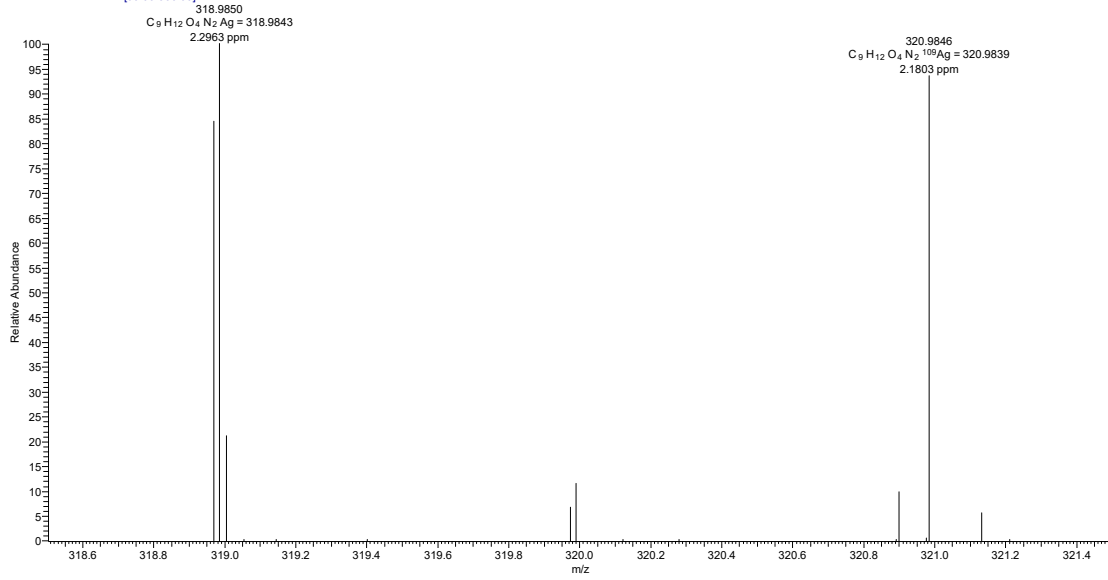

**Figure S3.**  $^1\text{H}$  and  $^{13}\text{C}\{^1\text{H}\}$  NMR, IR and HR-ESI-MS spectra of complexes **2c** and **2c'**.

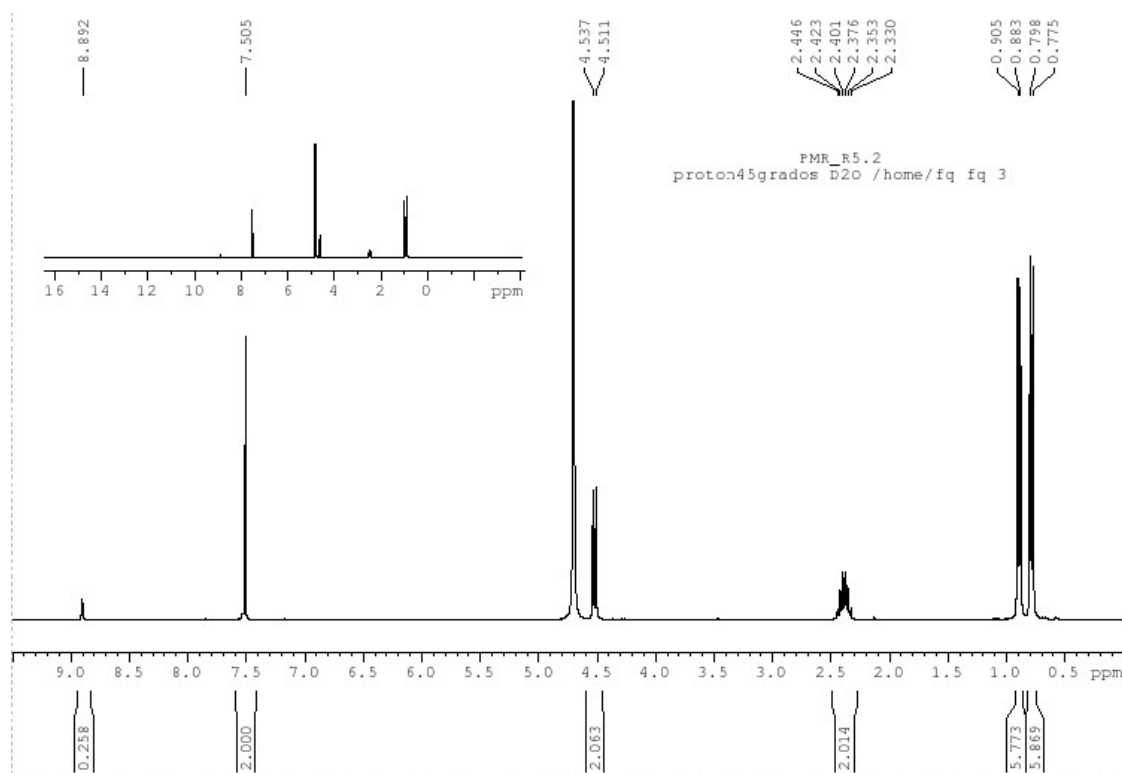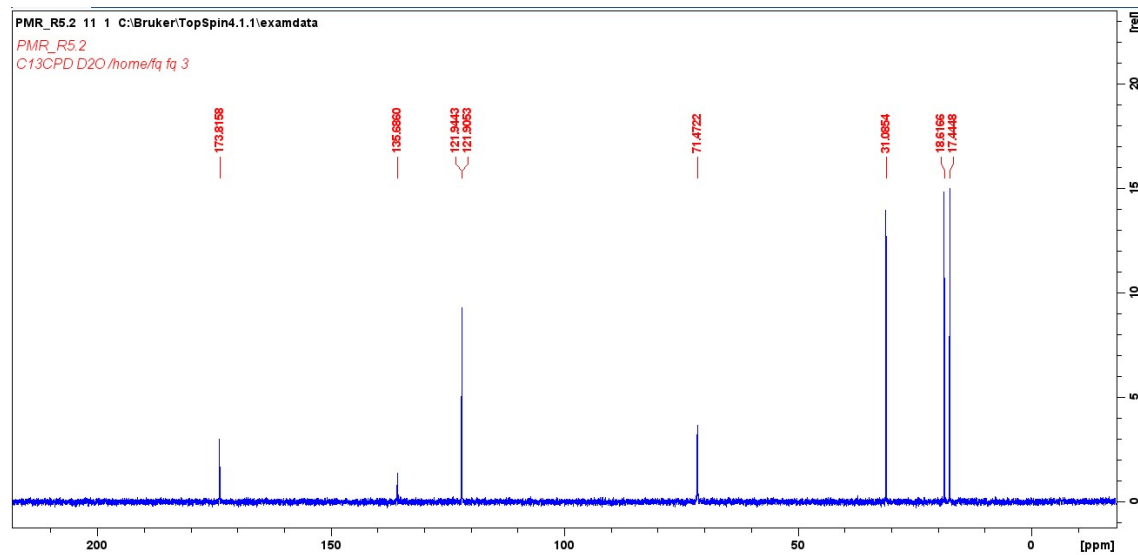

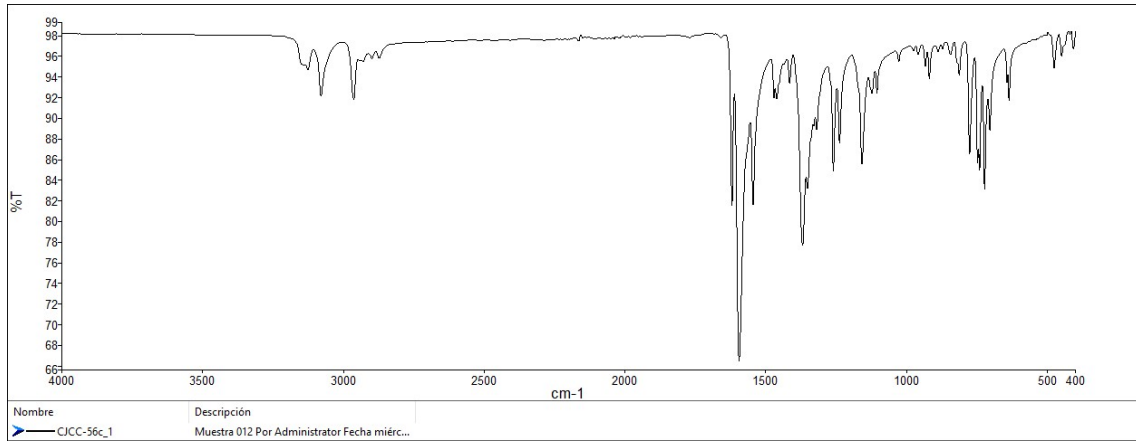

211119\_C/JCC45 11/19/21 12:15:12 C/JCC-45 PM=375 C13H20AgN2O4+

211119\_C/JCC45 #42-62 RT: 0.22-0.30 AV: 21 NL: 1.95E4  
 T: FTMS - c ESI Full ms [60.00-900.00]

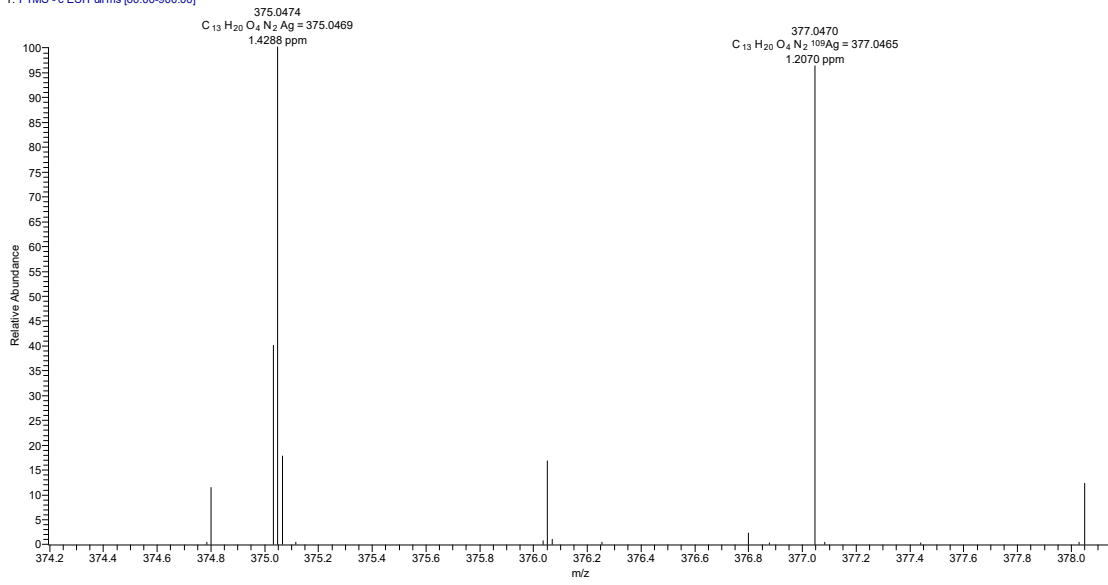



**Figure S4.**  $^1\text{H}$  and  $^{13}\text{C}\{^1\text{H}\}$  NMR, IR and HR-ESI-MS spectra of complex **2d**.

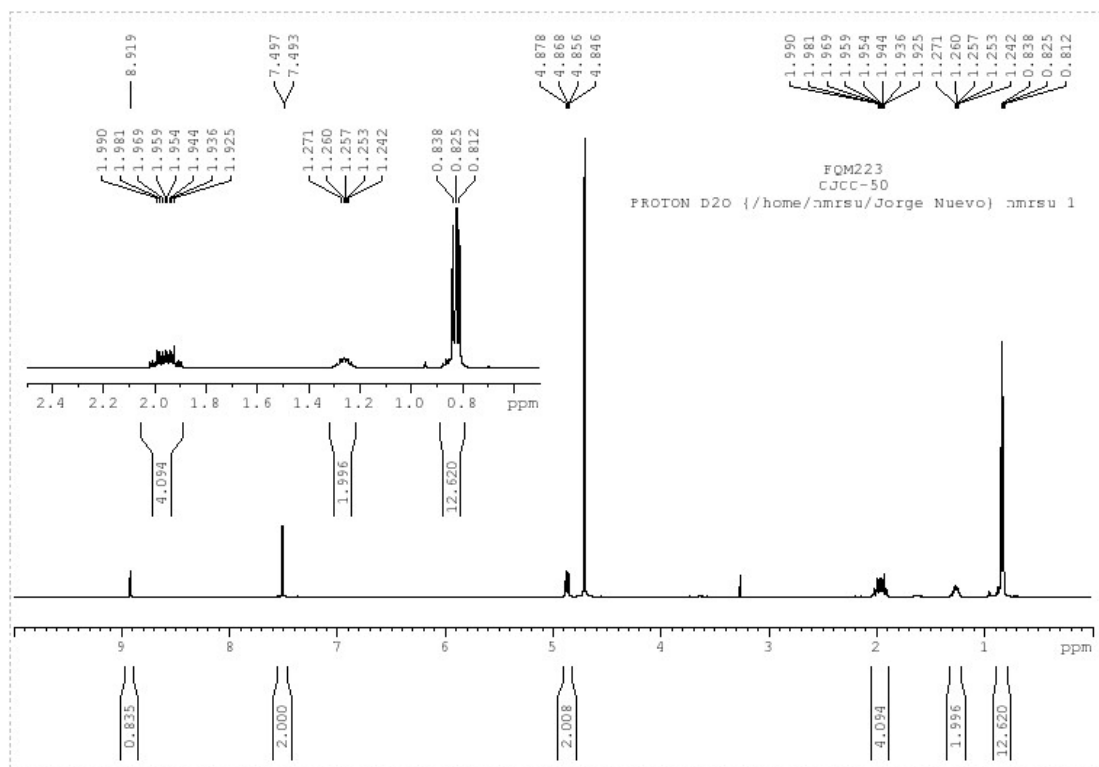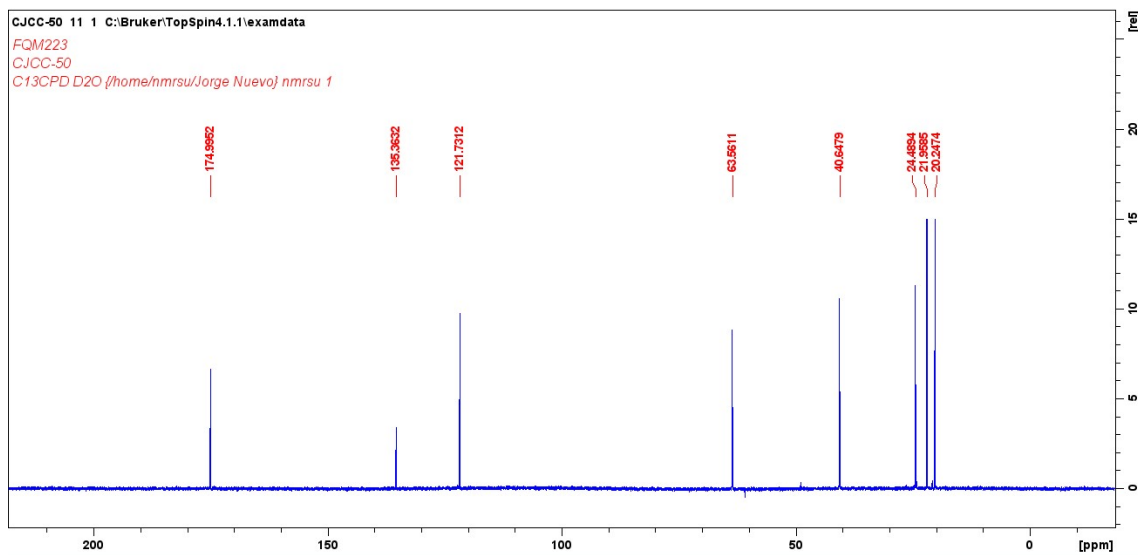

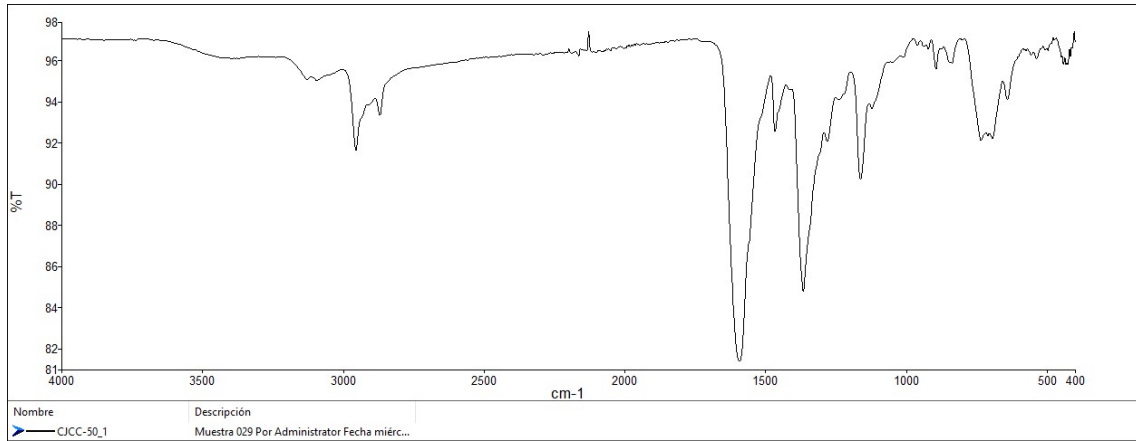

210928\_CJCC50

09/28/21 10:58:30

CJCC-50

PM=403

C15H24AgN2O4

210928\_CJCC50 #124-145 RT: 0.53-0.62 AV: 22 NL: 2.37E4  
T: FTMS - c ESI Full ms [60.00-900.00]

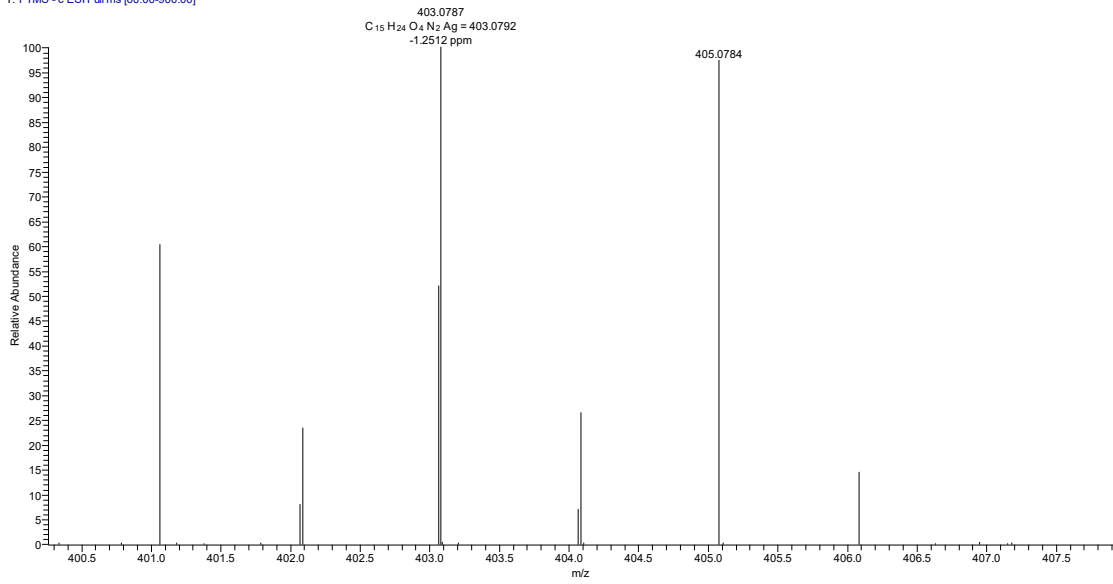

**Figure S5.**  $^1\text{H}$  and  $^{13}\text{C}\{^1\text{H}\}$  NMR, IR and HR-ESI-MS spectra of complex **2e**.

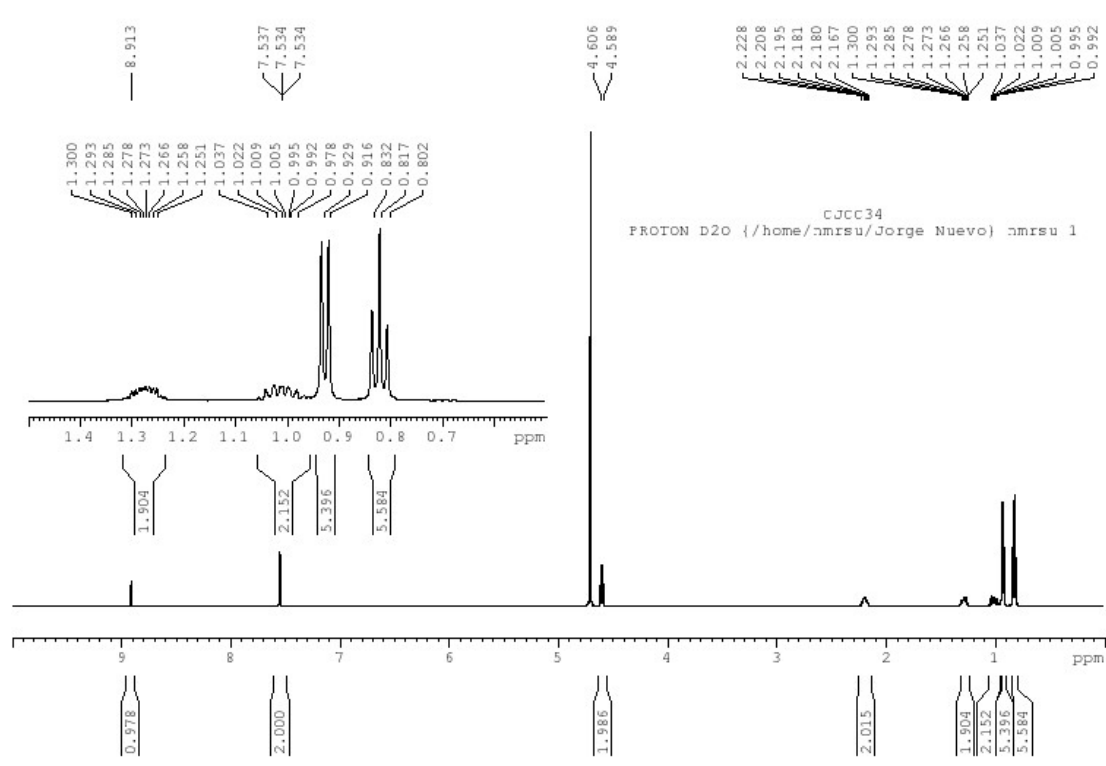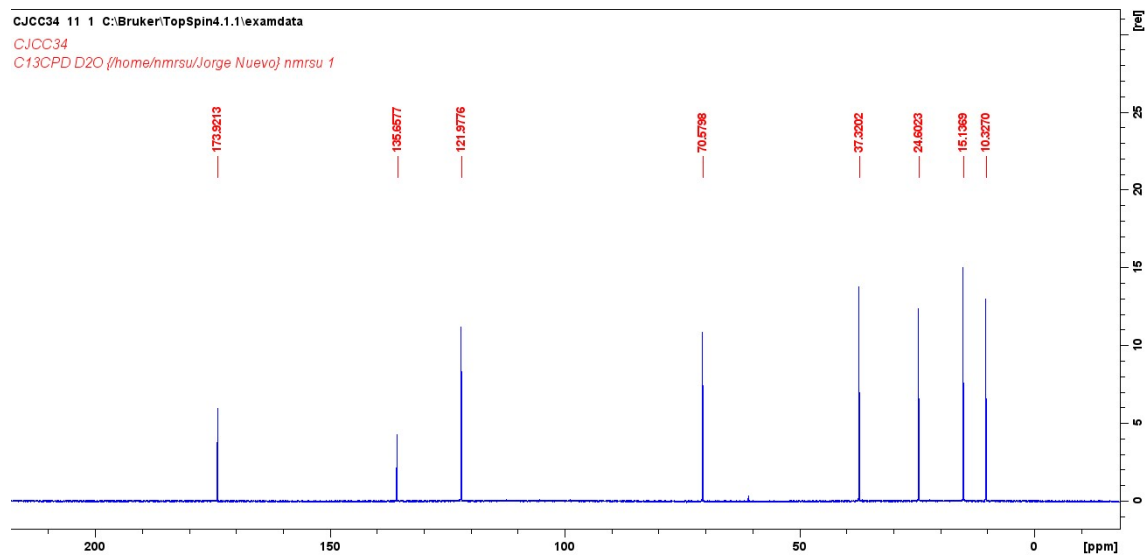

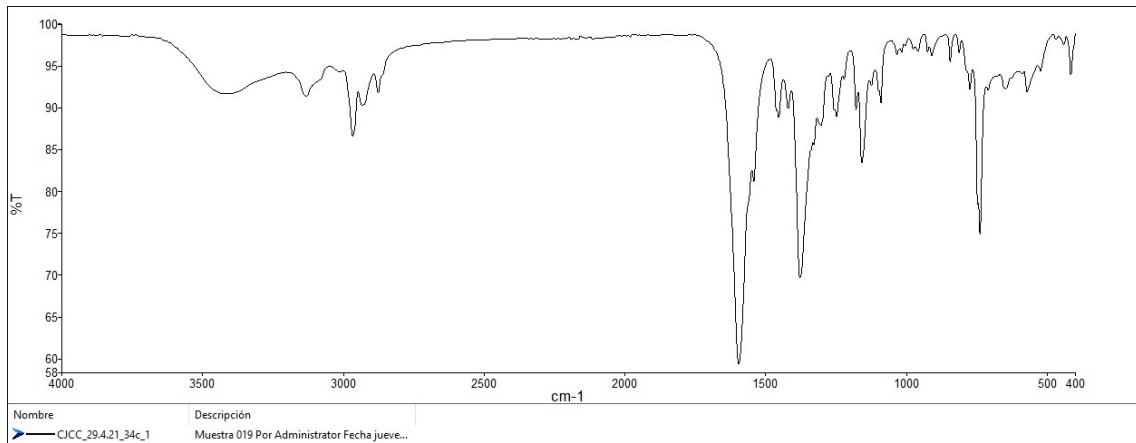

210517\_CJCC-34

05/17/21 12:32:23

CJCC-34

PM=403

C<sub>15</sub>H<sub>23</sub>AgN<sub>4</sub>O<sub>8</sub>

210517\_CJCC-34 #55-79 RT: 0.24-0.34 AV: 25 SB: 48 1.08-1.31 NL: 1.58E5  
 T: FTMS - c ESI Full ms [60.00-900.00]

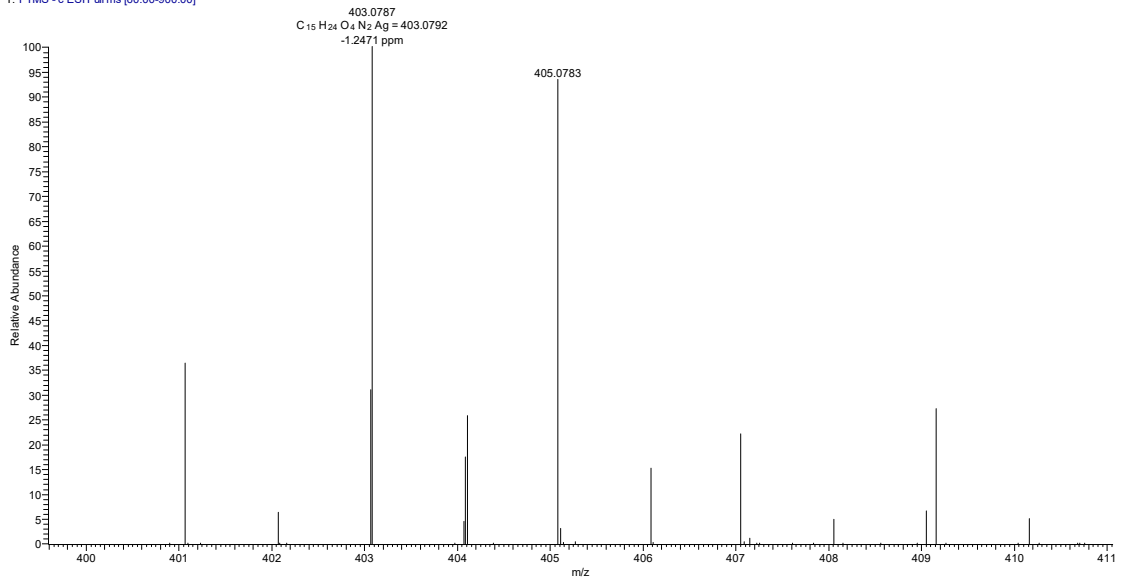

**Figure S6.**  $^1\text{H}$  and  $^{13}\text{C}\{^1\text{H}\}$  NMR, IR and HR-ESI-MS spectra of complex **2f**.

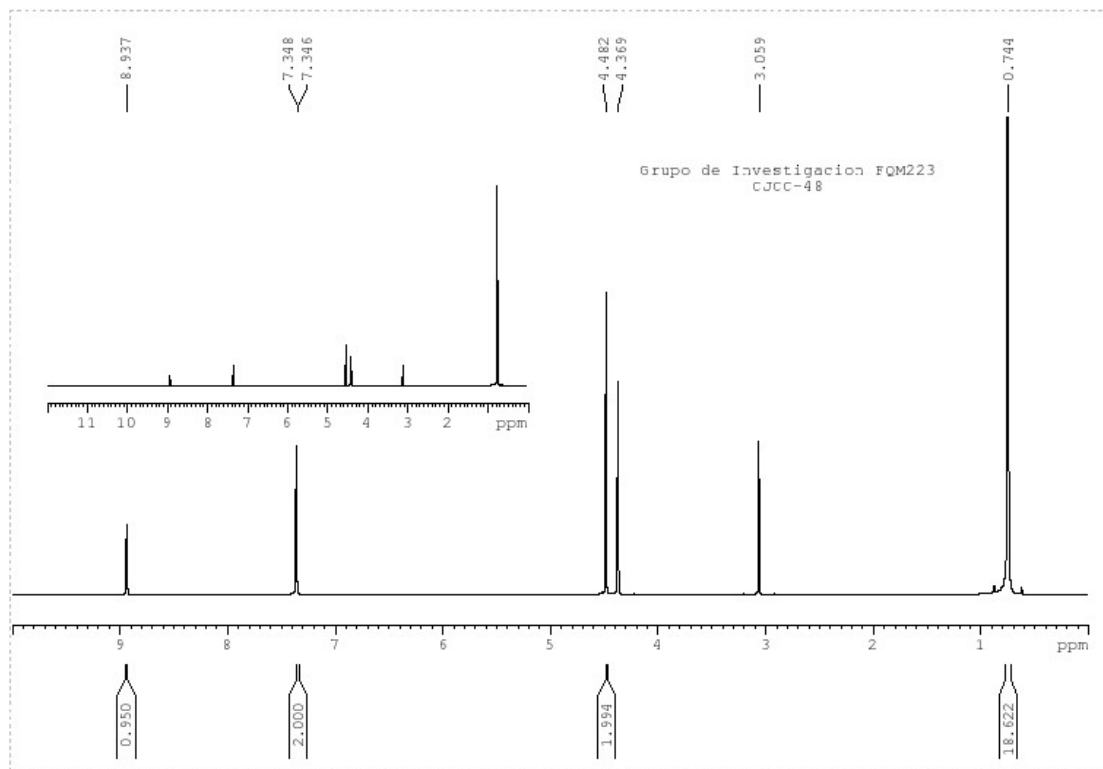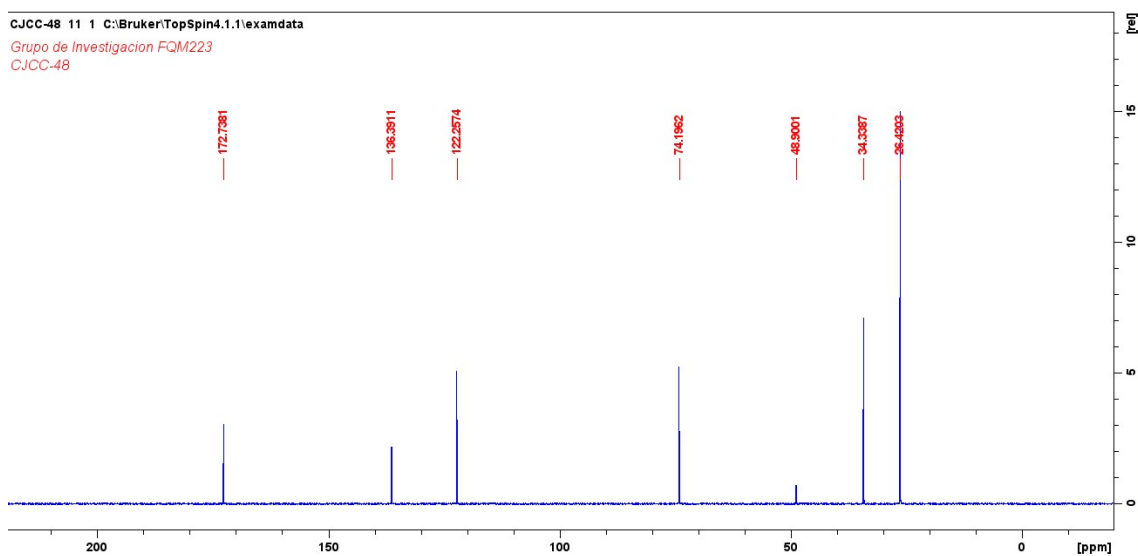

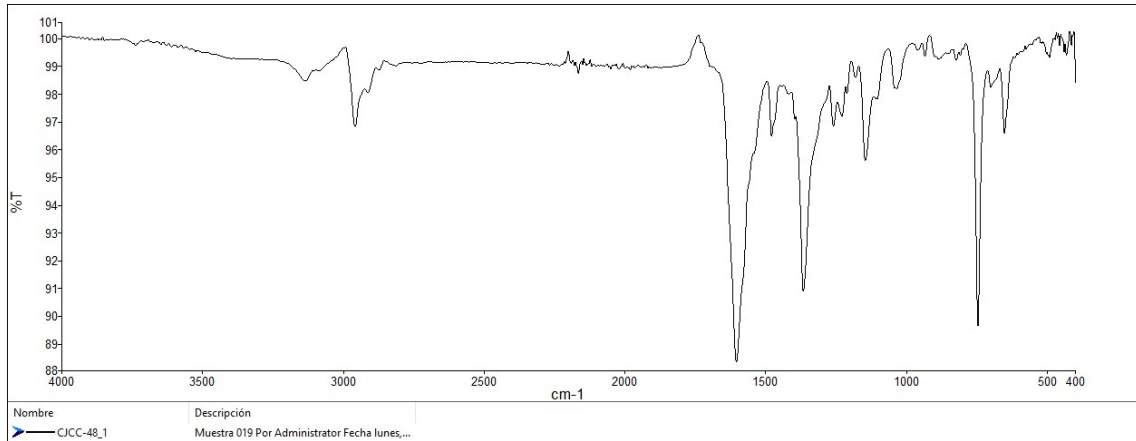

210527\_C/JCC48 05/27/21 14:10:18 C/JCC-48 PM=403 C15H24AgN2O4

210527\_C/JCC48 #111-131 RT: 0.46-0.55 AV: 21 SB: 81 1.61-2.00 NL: 1.41E5  
T: FTMS - c ESI Full ms [60.00-900.00]

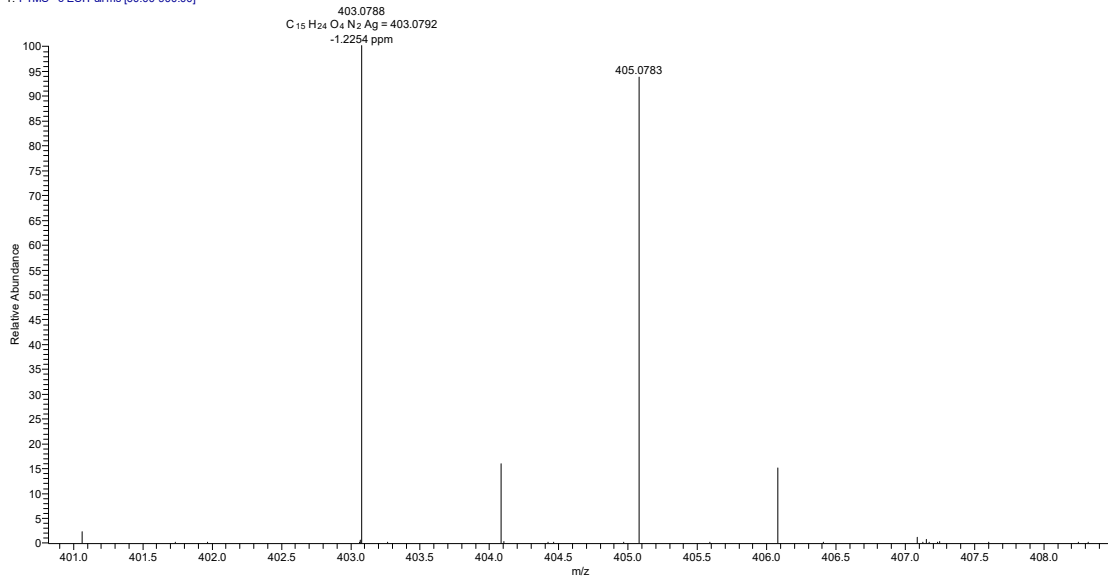

**Figure S7.** Views of the coordination polymer of  $\{\text{Ag}[(S,S)\text{-L}^{\text{iPr}}]\}_n$  (**2c**): (a), along  $a$  axis  
(b) along  $c$  axis.

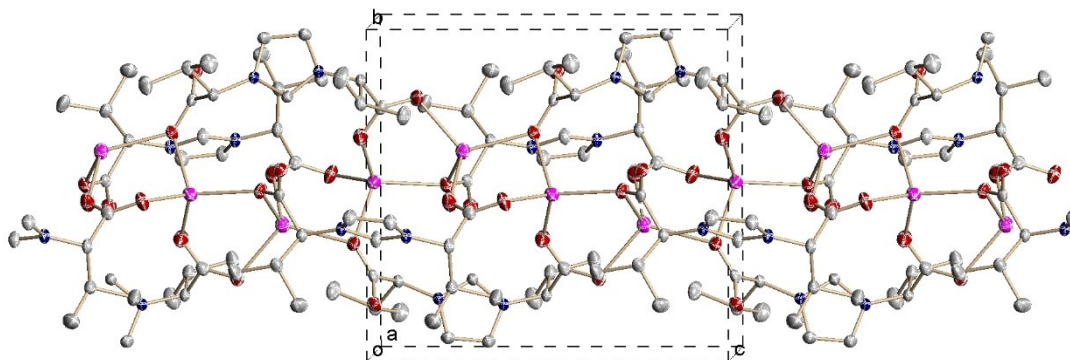

(a)

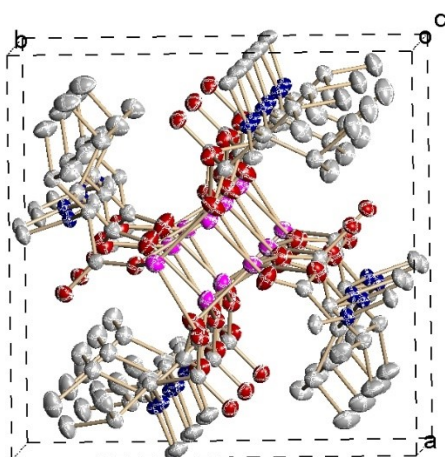

(b)

**Figure S8.** (a) Asymmetric unit of  $\{Ag[(R,R)\text{-L}^{\text{iPr}}]\}_n$  (**2c'**) and views of the coordination polymer: (b), along *a* axis (c) along *c* axis.

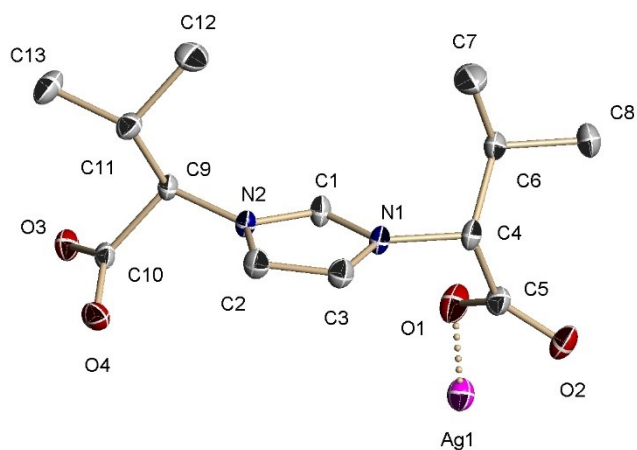

(a)

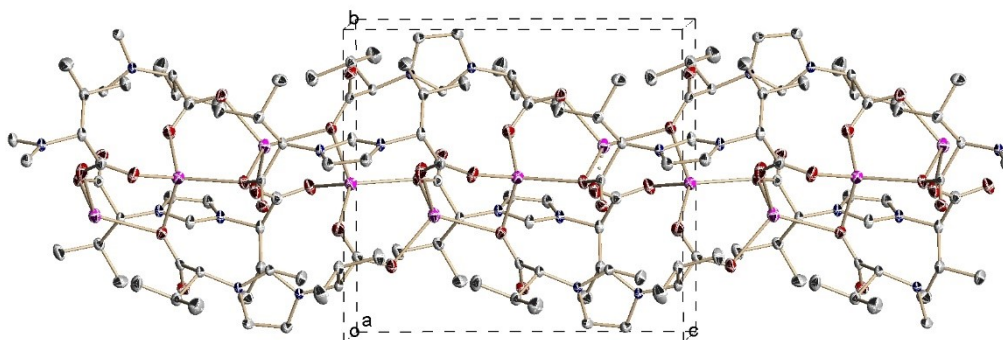

(b)

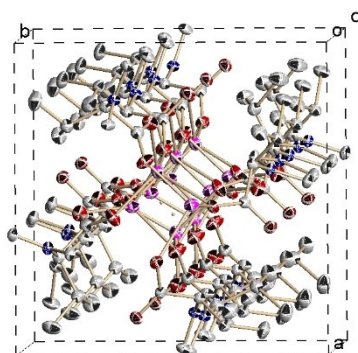

(c)



**Figure S9.** View of the 3D architecture of compounds **2c** and **2c'**, with three 1D coordination polymers along *a* axis (three unit cells).

**2c**

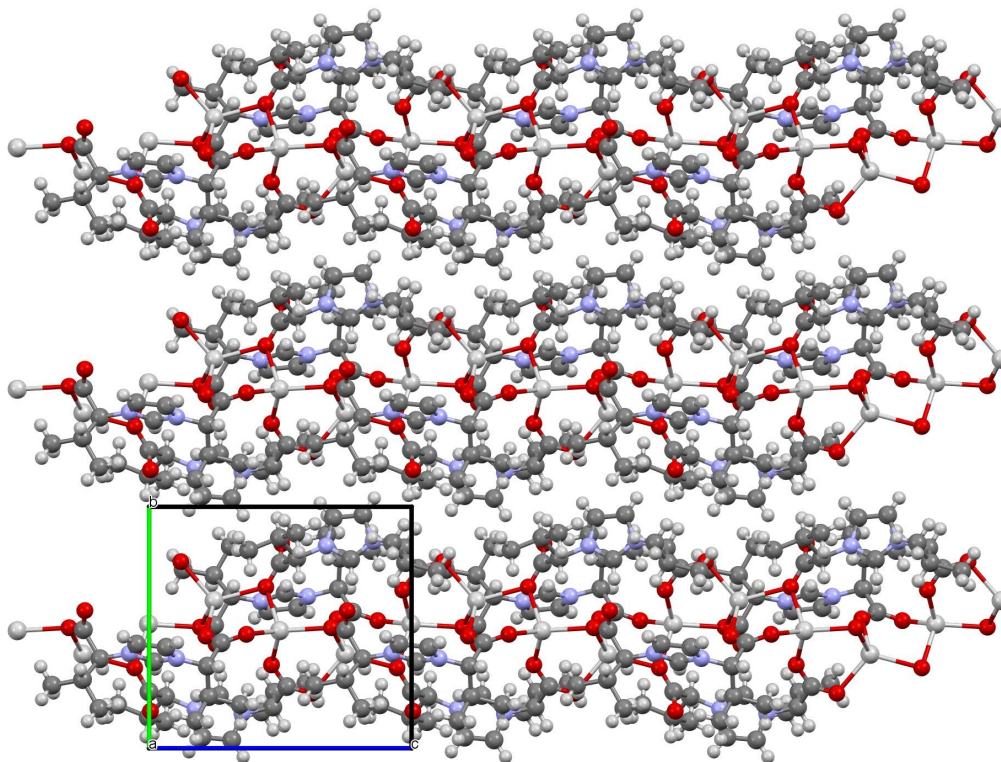

**2c'**

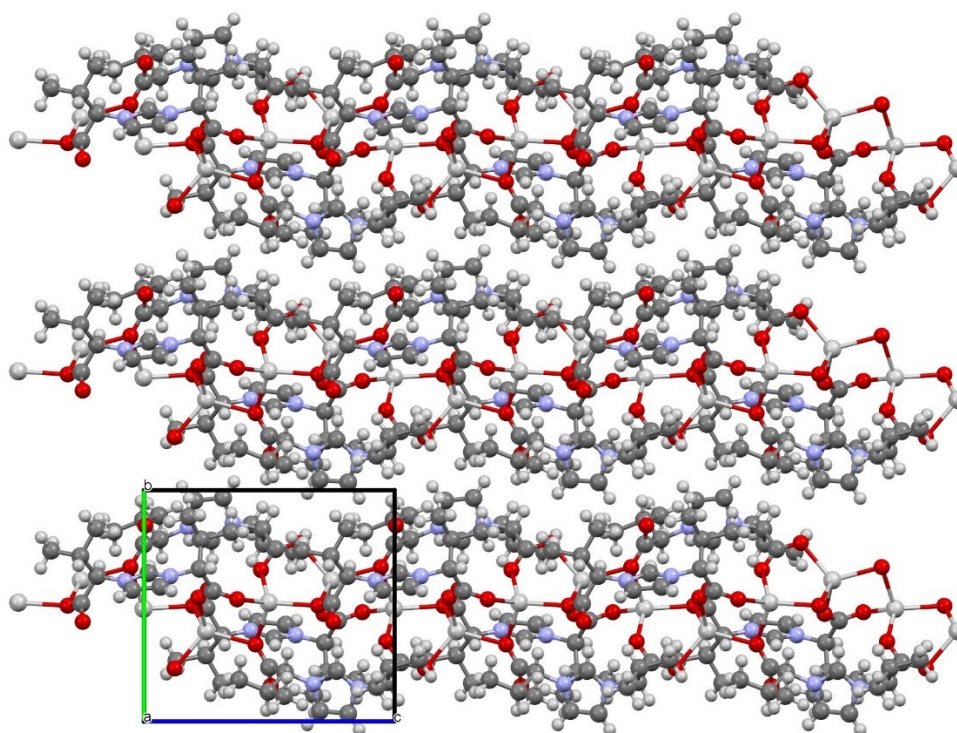

**Figure S10.** DFT profile of the mechanism for the carbene intermediate formation.

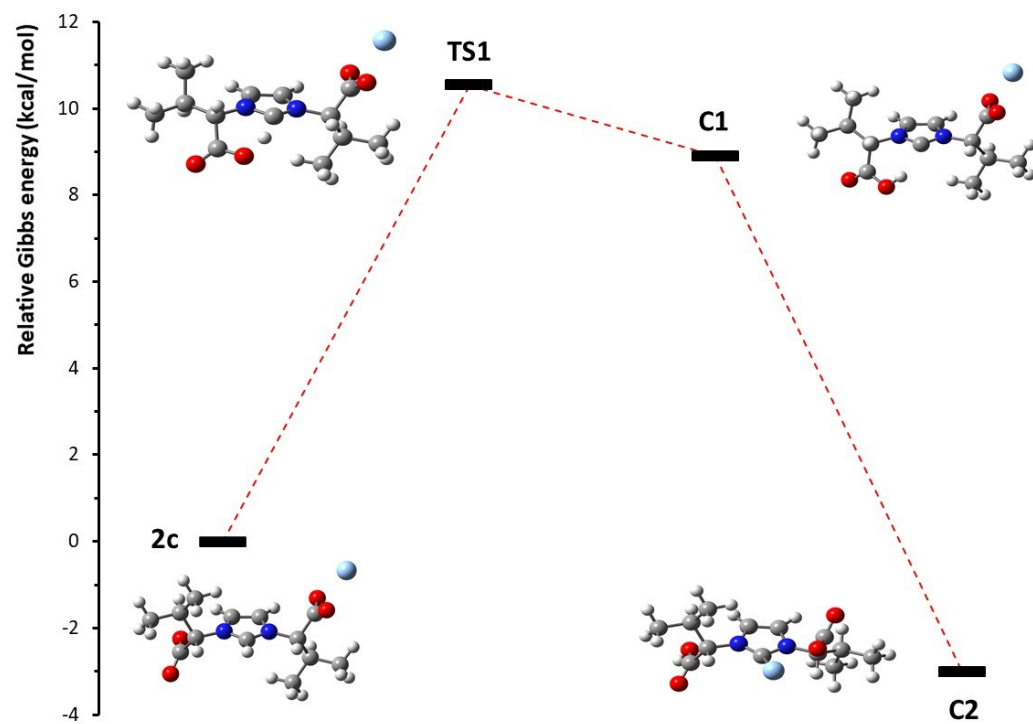

**Figure S11.** DFT profile of the mechanism for the H-D exchange with D<sub>2</sub>O mediated by silver(I).

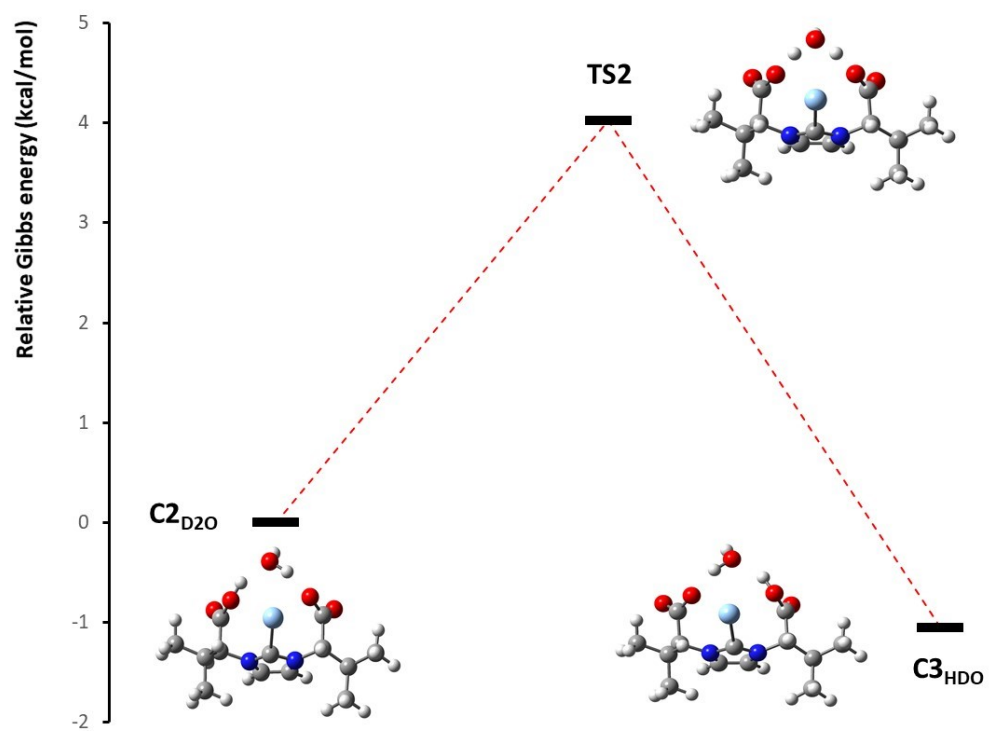

**Figure S12.** DFT profile of the deuteration mechanism of the C<sup>2</sup>-H position.

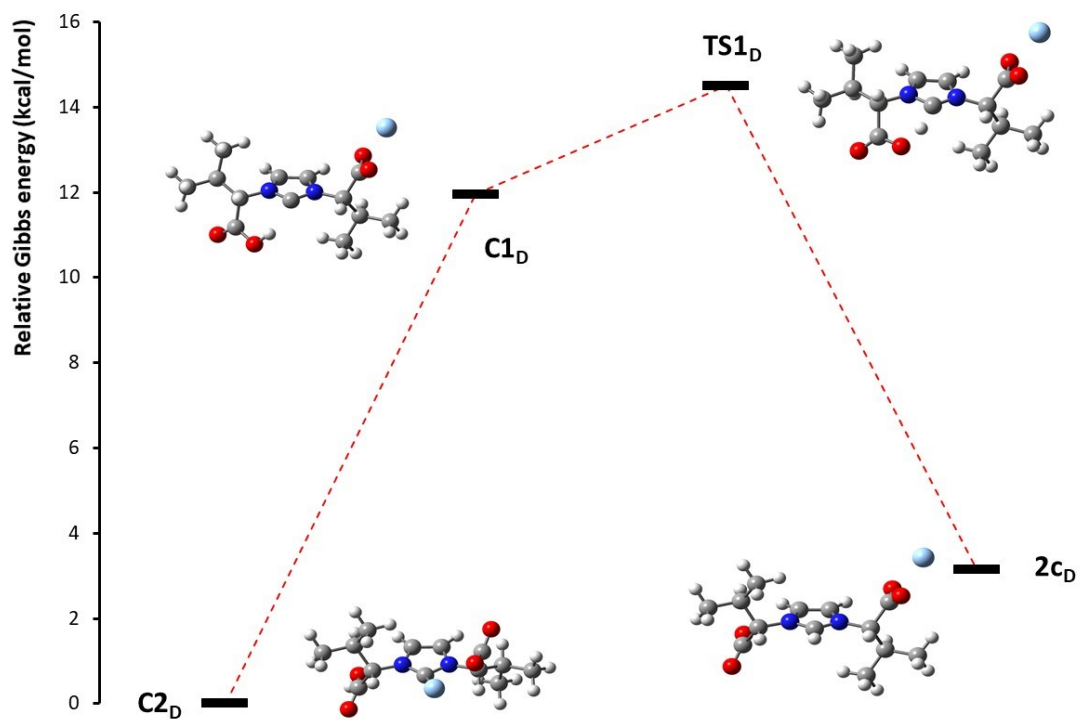

**Figure S13.** Relative MDA quantification for complex **2c** (control is considered as 100%) for *E. coli* (in blue) and *P. aeruginosa* (in red) assays. Control ranges are 0-0.2 nMol/mg for *E.coli* and 0.1-0.27 nMol/mg for *P. aeruginosa*.

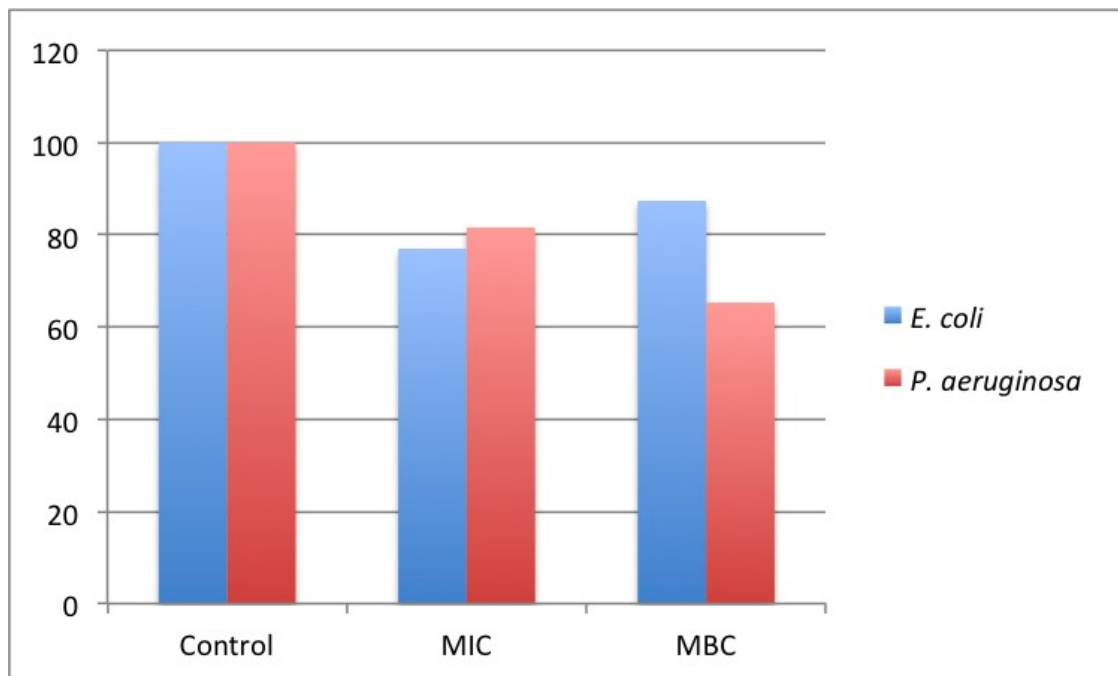

**Figure S14.** Relative MDA quantification for complex **2c'** (control is considered as 100%) for *E. coli* (in blue) and *P. aeruginosa* (in red) assays. Control ranges are 0-0.2 nMol/mg for *E.coli* and 0.1-0.27 nMol/mg for *P. aeruginosa*.

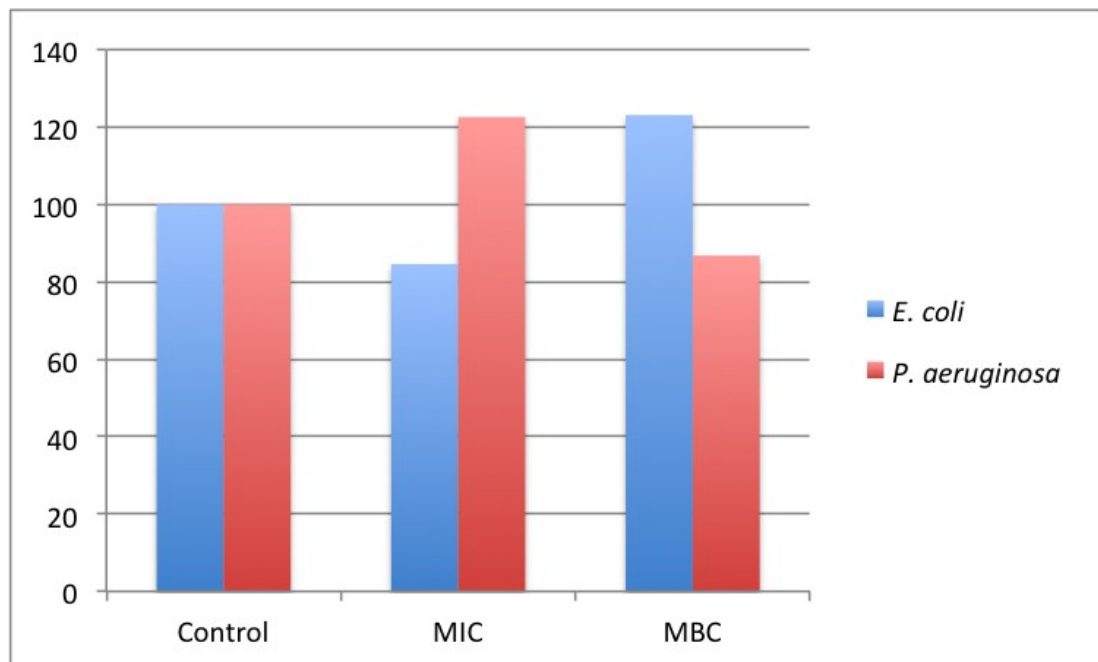

**Figure S15.** Evaluation of biofilm formation of *E. coli* (top) and *P. aeruginosa* (bottom) exposed to complex **2c** (A: control, B: MIC, C: MBC).

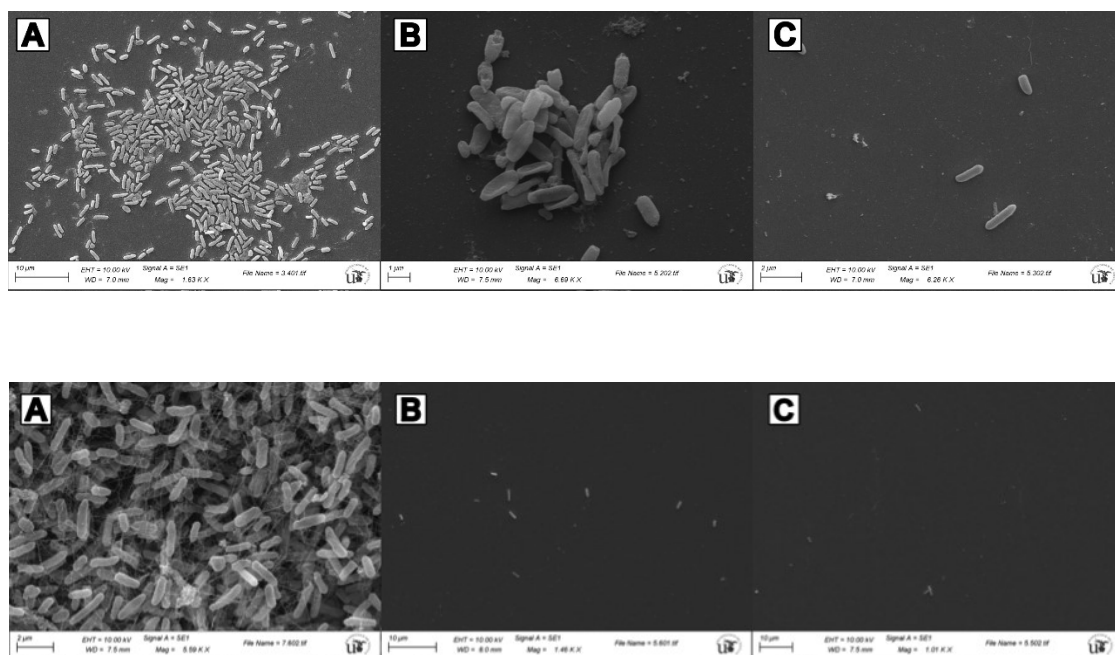

**Fig. S16.** CD spectra of the enantiomeric pairs **2b-2b'** (a) and **2c-2c'** (b). Electronic circular dichroism (CD) spectra were recorded in a Biologic Mos-450 spectropolarimeter. Spectra were collected under air at a concentration value of  $10^{-3}$  M. Sweeps were taken from 220 to 350 nm. Each spectrum was obtained from an average of 5 runs, using a standard quartz cell of 10 mm path length. The spectra obtained were expressed in terms of ellipticity,  $\Theta_{\text{obs}}$ .

(a)

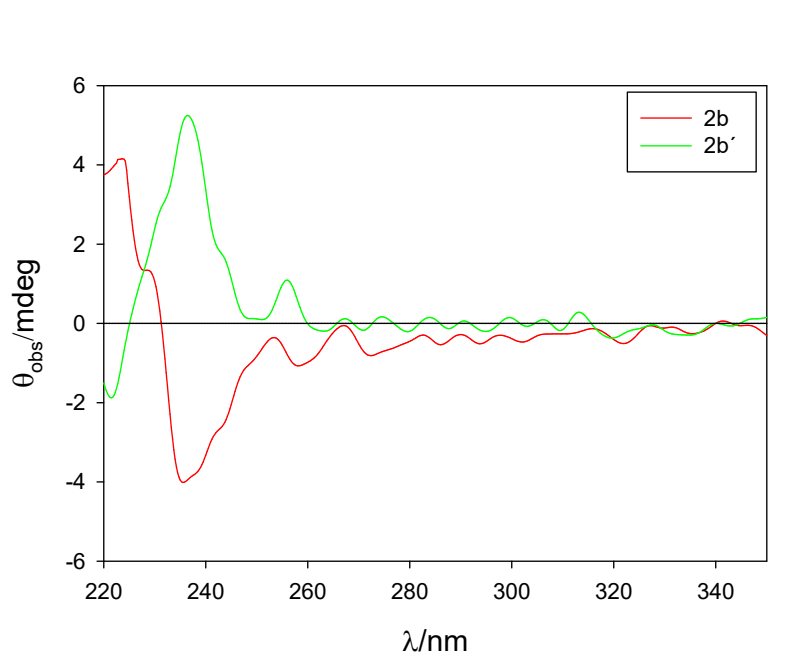

(b)

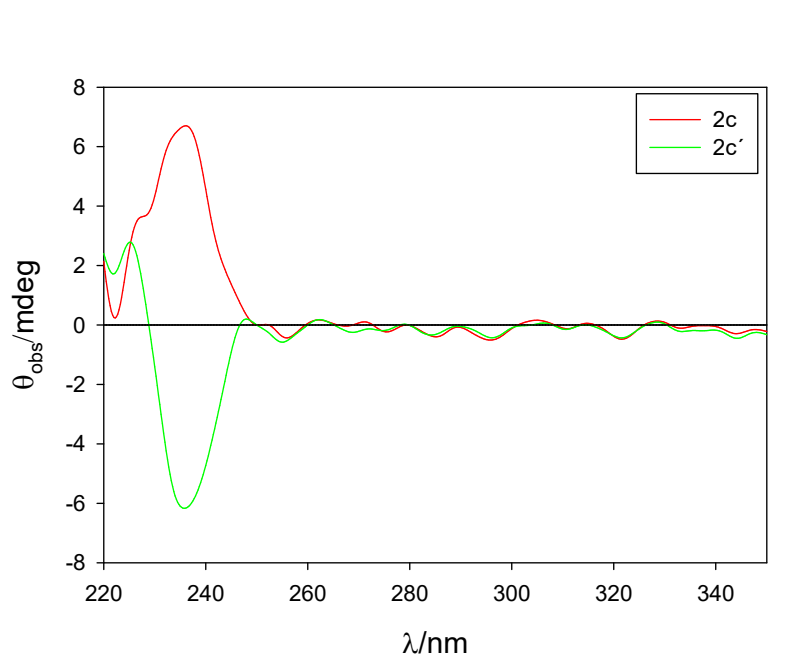



**Figure S17.**  $^1\text{H}$ -DOSY spectrum (500 MHz, 25 °C,  $\text{H}_2\text{O}$ ) of compounds **1a** (a), **2a** (b) and  $\{\text{Na}[\text{L}^{\text{H}}]\}_n$  (c). Pulse program: ledbpgp2s,  $\delta = 0.9$  ms,  $\Delta = 120$  ms, LED = 5 ms, recycle delay: 5 s, 16 scans, time domain: 38k x 24 points, measurement time: 55 min, apodization: exponential broadening (0.3 Hz), spectrum: 32 k x 64 points.

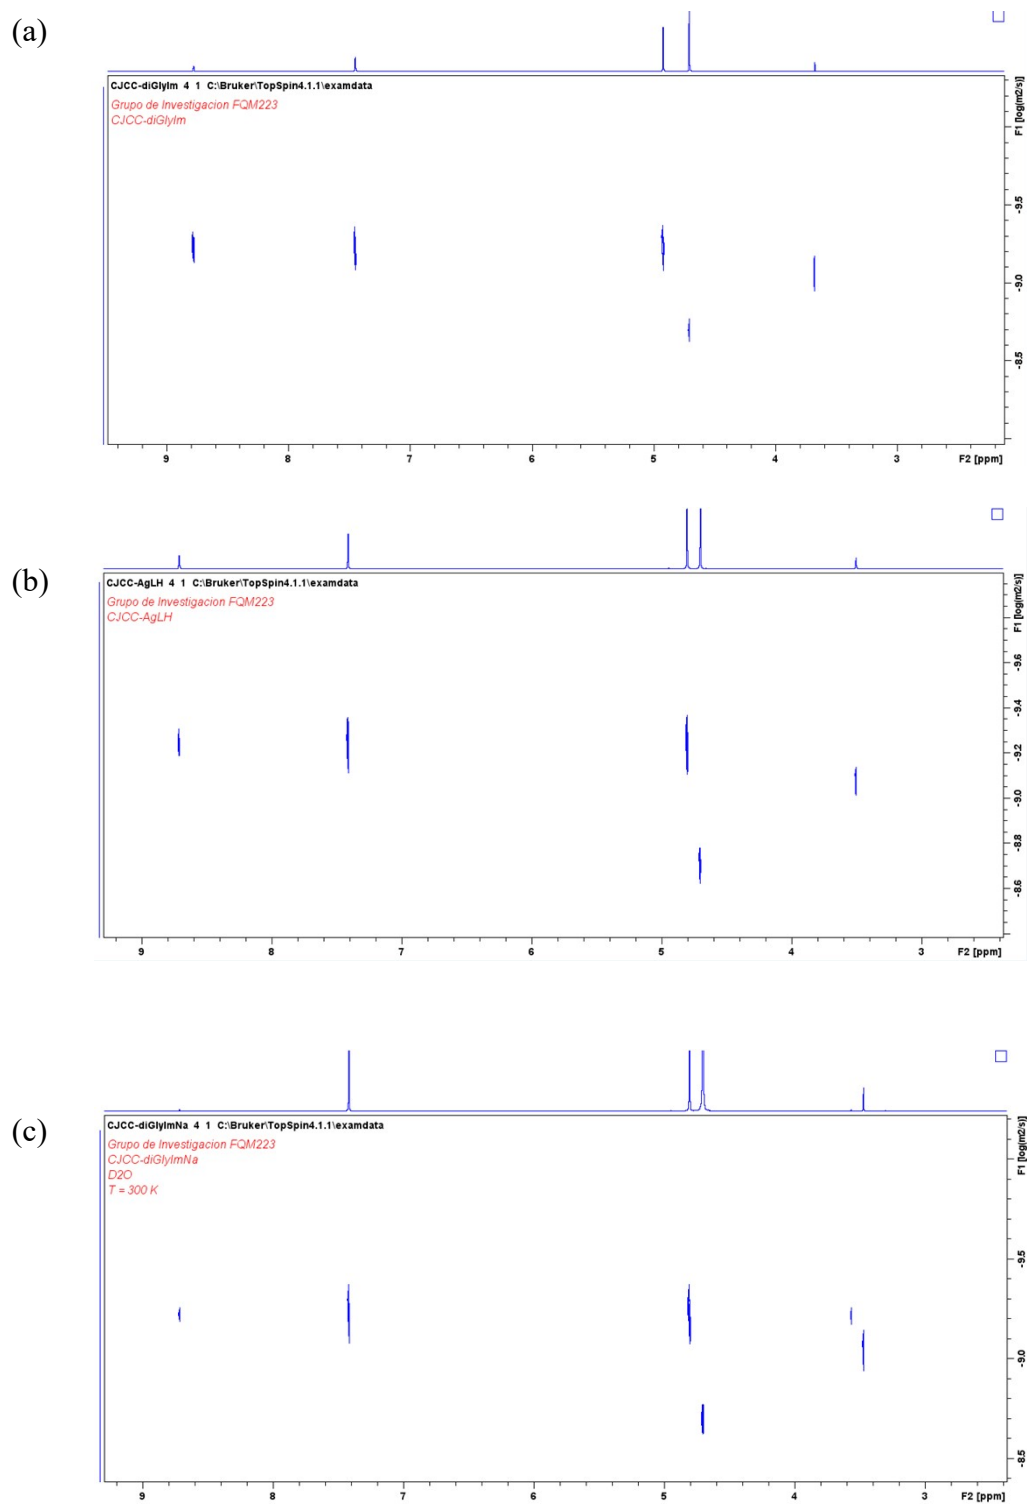

**Table S1.** Conductivity measurements ( $\mu\text{S}/\text{cm}$ ) of compounds **1** and **2** at  $25^\circ\text{C}$  ( $10^{-3}\text{M}$ ) in mili-Q water.

| R Group                      | $\text{HL}^{\text{R}}$ , <b>1</b> | $\{\text{Ag}[(S,S)\text{-L}^{\text{R}}]\}_n$ , <b>2</b> |
|------------------------------|-----------------------------------|---------------------------------------------------------|
| H ( <b>a</b> )               | 255                               | 87.1                                                    |
| Me ( <b>b</b> )              | 270                               | 72.4                                                    |
| <sup>i</sup> Pr ( <b>c</b> ) | 279                               | 84.0                                                    |
| <sup>i</sup> Bu ( <b>d</b> ) | 257                               | 75.5                                                    |
| <sup>s</sup> Bu ( <b>e</b> ) | 269                               | 60.3                                                    |
| <sup>t</sup> Bu ( <b>f</b> ) | 242                               | 85.6                                                    |

|                                                |       |
|------------------------------------------------|-------|
| $\text{H}_2\text{O}$ mili-Q                    | 0.1   |
| $\{\text{Na}[(S,S)\text{-L}^{\text{iPr}}]\}_n$ | 78.9  |
| $\text{AgNO}_3$                                | 153.5 |
| $\text{NaCl}$                                  | 128.4 |

**Table S2.** Crystal data and structure refinement for compounds **2c**, **2c'** and **2e** from single-crystal X-ray crystallography.

| Compound                                            | <b>2c</b>                                                       | <b>2c'</b>                                                      | <b>2e</b>                                                       |
|-----------------------------------------------------|-----------------------------------------------------------------|-----------------------------------------------------------------|-----------------------------------------------------------------|
| Formula                                             | C <sub>13</sub> H <sub>19</sub> AgN <sub>2</sub> O <sub>4</sub> | C <sub>13</sub> H <sub>19</sub> AgN <sub>2</sub> O <sub>4</sub> | C <sub>15</sub> H <sub>27</sub> AgN <sub>2</sub> O <sub>6</sub> |
| M                                                   | 375.17                                                          | 375.17                                                          | 439.25                                                          |
| T [K]                                               | 193(2)                                                          | 193(2)                                                          | 193(2)                                                          |
| Wavelength [Å]                                      | 0.71073                                                         | 0.71073                                                         | 0.71073                                                         |
| Crystal system                                      | Tetragonal                                                      | Tetragonal                                                      | Monoclinic                                                      |
| Space group                                         | P4 <sub>1</sub>                                                 | P4 <sub>3</sub>                                                 | C <sub>2</sub>                                                  |
| a [Å]                                               | 10.9520(4)                                                      | 10.9697(5)                                                      | 27.9770(19)                                                     |
| b [Å]                                               | 10.9520(4)                                                      | 10.9697(5)                                                      | 8.3951(6)                                                       |
| c [Å]                                               | 11.9218(5)                                                      | 11.8981(7)                                                      | 7.9560(5)                                                       |
| α = γ [°]                                           | 90                                                              | 90                                                              | 90                                                              |
| β [°]                                               | 90                                                              | 90                                                              | 92.298(2)                                                       |
| V [Å <sup>3</sup> ]                                 | 1429.98(12)                                                     | 1431.75(16)                                                     | 1867.1(2)                                                       |
| Z                                                   | 4                                                               | 4                                                               | 4                                                               |
| D <sub>calcd.</sub> [Mg·m <sup>-3</sup> ]           | 1.743                                                           | 1.740                                                           | 1.434                                                           |
| μ [mm <sup>-1</sup> ]                               | 1.424                                                           | 1.422                                                           | 1.110                                                           |
| F(000)                                              | 760                                                             | 760                                                             | 904                                                             |
| Crystal size [mm <sup>3</sup> ]                     | 0.400 x 0.400 x<br>0.200                                        | 0.500 x 0.450 x<br>0.400                                        | 0.400 x 0.200 x<br>0.100                                        |
| θ range for data collection [°]                     | 2.525 to 30.512                                                 | 2.525 to 30.527                                                 | 2.562 to 30.528°                                                |
| Index ranges                                        | -15≤h≤15, -15≤k≤15,<br>-16≤l≤17                                 | -15≤h≤15, -15≤k≤15,<br>-16≤l≤17                                 | -39≤h≤39, -11≤k≤12,<br>-11≤l≤11                                 |
| Reflections collected                               | 79993                                                           | 23660                                                           | 20315                                                           |
| Independent reflections                             | 4288 [R(int) =<br>0.0267]                                       | 3329 [R(int) =<br>0.0288]                                       | 5555 [R(int) =<br>0.0364]                                       |
| Completeness to theta                               | = 25.242°<br>99.9 %                                             | = 25.242°<br>90.7 %                                             | = 25.242°<br>96.6 %                                             |
| Absorption correction                               | Semi-empirical from<br>equivalents                              | Semi-empirical from<br>equivalents                              | Semi-empirical from<br>equivalents                              |
| Max. and min. transmission                          | 0.7461 and 0.6494                                               | 0.7461 and 0.6489                                               | 0.7461 and 0.5425                                               |
| Refinement method                                   | Full-matrix least-<br>squares on F <sup>2</sup>                 | Full-matrix least-<br>squares on F <sup>2</sup>                 | Full-matrix least-<br>squares on F <sup>2</sup>                 |
| Data / restraints /<br>parameters                   | 4288 / 1 / 186                                                  | 3329 / 1 / 185                                                  | 5555 / 25 / 233                                                 |
| Goodness-of-fit on<br>F <sup>2</sup>                | 1.090                                                           | 1.039                                                           | 1.157                                                           |
| Final R indices<br>[I>2σ(I)]                        | R1 = 0.0140, wR2 =<br>0.0339                                    | R1 = 0.0183, wR2 =<br>0.0509                                    | R1 = 0.0334, wR2 =<br>0.0772                                    |
| R indices (all data)                                | R1 = 0.0147, wR2 =<br>0.0347                                    | R1 = 0.0185, wR2 =<br>0.0510                                    | R1 = 0.0337, wR2 =<br>0.0774                                    |
| Absolute structure<br>parameter                     | -0.022(4)                                                       | -0.005(8)                                                       | 0.018(7)                                                        |
| Extinction<br>coefficient                           | 0.0367(11)                                                      | n/a                                                             | n/a                                                             |
| Largest diff. peak<br>and hole [e·Å <sup>-3</sup> ] | 0.351 and -0.41                                                 | 0.655 and -0.616                                                | 1.421 and -1.167                                                |

**Table S3.** Selected bond lengths (Å) and angles (°) for complexes **2c**, **2c'** and **2e**.<sup>a</sup>

| Complex                   | <b>2c</b>                                                                                                                                                                                   | <b>2c'</b>                                                                                                                                                                                  | <b>2e</b>                                                                            |
|---------------------------|---------------------------------------------------------------------------------------------------------------------------------------------------------------------------------------------|---------------------------------------------------------------------------------------------------------------------------------------------------------------------------------------------|--------------------------------------------------------------------------------------|
| O-C <sub>(carboxy.)</sub> | O(1)-C(5) 1.244(2)<br>O(2)-C(5) 1.252(2)<br>O(3)-C(10) 1.240(2)<br>O(4)-C(10) 1.265(2)                                                                                                      | O(1)-C(5) 1.244(2)<br>O(2)-C(5) 1.256(2)<br>O(3)-C(10) 1.264(3)<br>O(4)-C(10) 1.244(3)                                                                                                      | O(1)-C(1) 1.243(4)<br>O(2)-C(1) 1.257(4)<br>O(3)-C(7) 1.240(4)<br>O(4)-C(7) 1.258(4) |
| Ag-O                      | Ag(1)-O(1) 2.262(2)<br>Ag(1)-O(2)#1 2.330(2)<br>Ag(1)-O(4)#2 2.402(1)<br>Ag(1)-O(4)#3 2.434(1)                                                                                              | Ag(1)-O(1) 2.256(2)<br>Ag(1)-O(2)#1 2.327(2)<br>Ag(1)-O(3)#2 2.401(2)<br>Ag(1)-O(3)#3 2.432(2)                                                                                              | Ag(1)-O(2) 2.230(3)<br>Ag(1)-O(4)#1 2.310(2)                                         |
| Ag...Ag                   | Ag(1)...Ag(1)# 3.447(1)                                                                                                                                                                     | Ag(1)...Ag(1)# 3.436(1)                                                                                                                                                                     | Ag(1)...Ag(1) 3.958 <sup>b</sup><br>Ag(1)...Ag(1) 4.045 <sup>b</sup>                 |
| O-C-O                     | O(1)-C(5)-O(2) 128.8(2)<br>O(3)-C(10)-O(4) 126.1(2)                                                                                                                                         | O(1)-C(5)-O(2) 127.9(3)<br>O(3)-C(10)-O(4) 126.1(2)                                                                                                                                         | O(1)-C(1)-O(2) 126.9(3)<br>O(3)-C(7)-O(4) 125.2(3)                                   |
| O-Ag-O                    | O(1)-Ag(1)-O(2)#1 112.59(6)<br>O(1)-Ag(1)-O(4)#2 99.57(6)<br>O(2)#1-Ag(1)-O(4)#2 105.56(6)<br>O(1)-Ag(1)-O(4)#3 112.16(5)<br>O(2)#1-Ag(1)-O(4)#3 115.85(5)<br>O(4)#2-Ag(1)-O(4)#3 109.57(4) | O(1)-Ag(1)-O(2)#1 112.49(8)<br>O(1)-Ag(1)-O(3)#2 99.82(8)<br>O(2)#1-Ag(1)-O(3)#2 105.61(8)<br>O(1)-Ag(1)-O(3)#3 112.46(7)<br>O(2)#1-Ag(1)-O(3)#3 115.50(6)<br>O(3)#2-Ag(1)-O(3)#3 109.50(6) | O(2)-Ag(1)-O(4)#1 170.04(10)                                                         |
| Ag...Ag...Ag              | Ag(1)#4-Ag(1)-Ag(1)#1 138.4(1)                                                                                                                                                              | Ag(1)#1-Ag(1)-Ag(1)#4 138.5(1)                                                                                                                                                              | Ag(1)-Ag(1)-Ag(1) 167.5 <sup>b</sup>                                                 |

<sup>a</sup> Symmetry transformations used to generate equivalent atoms: **2c**: #1  $y, -x+1, z-1/4$ ; #2  $-x+1, -y+1, z+1/2$ ; #3  $y, -x+1, z+3/4$ ; #4  $-y+1, x, z+1/4$ ; #5  $-x+1, -y+1, z-1/2$ ; #6  $-y+1, x, z-3/4$ . **2c'**: #1  $-y+1, x, z-1/4$ ; #2  $-x+1, -y+1, z+1/2$ ; #3  $-y+1, x, z+3/4$ ; #4  $y, -x+1, z+1/4$ ; #5  $-x+1, -y+1, z-1/2$ ; #6  $y, -x+1, z-3/4$ . **2e**: #1  $-x+1, y+1, -z+1$ ; #2  $-x+1, y-1, -z+1$ . <sup>b</sup> measurement performed across the unit cell boundary.

**Table S4.** Coordinates of the optimised compounds of the H-D exchange mechanism.

**2c**

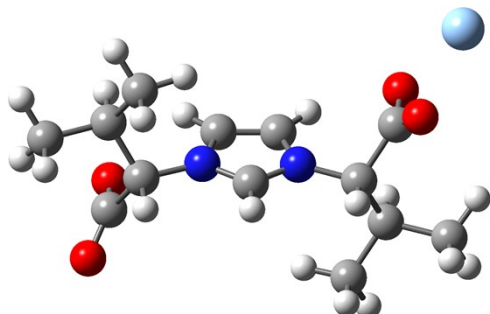

|    |             |             |             |
|----|-------------|-------------|-------------|
| Ag | 4.22317600  | -1.26807800 | 0.20138300  |
| O  | -4.60773700 | 0.45993100  | 1.73833300  |
| O  | 2.39309500  | 0.05504100  | 0.90544200  |
| O  | 2.75602600  | -0.14591200 | -1.28692900 |
| N  | -2.38150300 | -0.02204400 | 0.03783600  |
| N  | -0.30928200 | 0.65625600  | -0.04437500 |
| C  | -1.42106400 | 0.42870200  | -0.76631200 |
| C  | -0.58304100 | 0.33280800  | 1.27494900  |
| H  | 0.16886000  | 0.41414400  | 2.03828100  |
| C  | -1.87770100 | -0.08865000 | 1.32467300  |
| H  | -2.52553100 | -0.35848300 | 2.14075200  |
| C  | -3.77990600 | -0.30919900 | -0.36683500 |
| H  | -3.85291500 | -0.00380400 | -1.41280800 |
| C  | -4.75545400 | 0.60701300  | 0.50667600  |
| C  | 0.92877000  | 1.24391600  | -0.58550800 |
| H  | 0.79687300  | 1.28691900  | -1.66729400 |
| C  | 2.11792900  | 0.30142700  | -0.30037700 |
| O  | -5.52111100 | 1.31019400  | -0.16437200 |
| C  | 1.18089100  | 2.67017600  | -0.03603600 |
| H  | 1.30660500  | 2.57560700  | 1.04772900  |
| C  | -4.10277100 | -1.80907500 | -0.22257800 |
| H  | -4.00346000 | -2.05357000 | 0.84089100  |
| C  | -5.56102800 | -2.06448800 | -0.62965100 |
| H  | -5.80460300 | -3.12383200 | -0.50913900 |
| H  | -6.25410600 | -1.47989500 | -0.02364700 |
| H  | -5.72839000 | -1.79662600 | -1.67802900 |
| C  | -3.14664000 | -2.69667100 | -1.03267500 |
| H  | -3.22077200 | -2.47865200 | -2.10436200 |
| H  | -2.10228100 | -2.56886600 | -0.73202900 |
| H  | -3.39706400 | -3.75250300 | -0.89602200 |
| C  | -0.00792200 | 3.59651600  | -0.32131500 |
| H  | -0.17370100 | 3.70787500  | -1.39831600 |
| H  | -0.93498800 | 3.24006100  | 0.13231300  |
| H  | 0.19075100  | 4.59150200  | 0.08382200  |
| C  | 2.47796900  | 3.24300100  | -0.62426500 |
| H  | 3.34887800  | 2.63293600  | -0.37456000 |
| H  | 2.41897000  | 3.31596600  | -1.71487100 |
| H  | 2.65241700  | 4.24740300  | -0.23194700 |
| H  | -1.52169300 | 0.59710200  | -1.82425500 |

# TS1

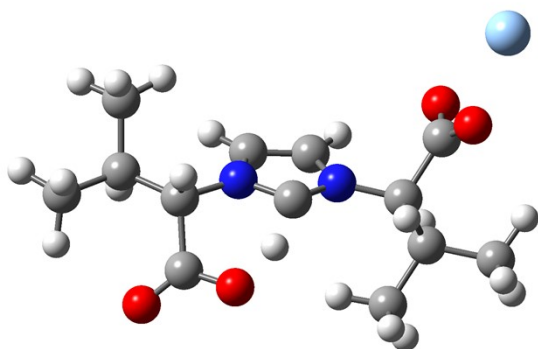

|    |             |             |             |
|----|-------------|-------------|-------------|
| Ag | 4.25603600  | -1.23066400 | -0.22677400 |
| O  | -5.26425100 | 1.27301100  | -0.37641700 |
| O  | 2.45205600  | -0.20581700 | 0.89972500  |
| O  | 2.73173900  | 0.22777600  | -1.26981000 |
| N  | -2.28730400 | -0.40406700 | 0.12542900  |
| N  | -0.31631000 | 0.46246300  | 0.21069200  |
| C  | -1.41060700 | 0.34999600  | -0.57384800 |
| C  | -0.50808200 | -0.21360200 | 1.40996800  |
| H  | 0.26313800  | -0.28616200 | 2.15542800  |
| C  | -1.75662900 | -0.74731600 | 1.36053400  |
| H  | -2.28046000 | -1.33391200 | 2.09219000  |
| C  | -3.66326200 | -0.57391600 | -0.43117400 |
| H  | -3.52493200 | -1.06409900 | -1.40114300 |
| C  | -4.18321300 | 0.88228300  | -0.77341100 |
| C  | 0.86222200  | 1.25802400  | -0.16485700 |
| H  | 0.67759300  | 1.58560700  | -1.18720900 |
| C  | 2.11183100  | 0.35270700  | -0.18159900 |
| O  | -3.35334600 | 1.55009400  | -1.51917300 |
| C  | 1.05891800  | 2.48913900  | 0.75364900  |
| H  | 1.23310300  | 2.11095000  | 1.76719600  |
| C  | -4.56146700 | -1.48502300 | 0.42047600  |
| H  | -4.62657900 | -1.06537300 | 1.43144400  |
| C  | -5.98880500 | -1.56396400 | -0.15128200 |
| H  | -6.56863900 | -2.29557000 | 0.41865700  |
| H  | -6.49037300 | -0.60107800 | -0.11389800 |
| H  | -5.96745700 | -1.90281500 | -1.19330000 |
| C  | -3.99327500 | -2.91804500 | 0.48631100  |
| H  | -4.02945500 | -3.38021800 | -0.50588000 |
| H  | -2.96059800 | -2.97590600 | 0.83282000  |
| H  | -4.60320100 | -3.53250000 | 1.15405800  |
| C  | -0.18970500 | 3.38029000  | 0.76051000  |
| H  | -0.40750000 | 3.76505000  | -0.24057500 |
| H  | -1.07629800 | 2.84992900  | 1.11262500  |
| H  | -0.03201500 | 4.23754400  | 1.42025800  |
| C  | 2.29710100  | 3.28688000  | 0.32059600  |
| H  | 3.21151000  | 2.69122600  | 0.37312200  |
| H  | 2.19071800  | 3.65165400  | -0.70583900 |
| H  | 2.42784100  | 4.15504400  | 0.97113200  |
| H  | -2.22453600 | 1.07784000  | -1.36538600 |

C1

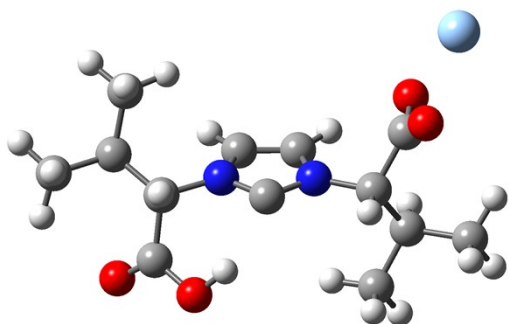

|    |             |             |             |
|----|-------------|-------------|-------------|
| Ag | 4.17878300  | -1.30364000 | -0.11734200 |
| O  | -5.44727300 | 0.98034000  | 0.20950800  |
| O  | 2.40231500  | -0.12105500 | 0.91369600  |
| O  | 2.74667300  | 0.14192000  | -1.27284300 |
| N  | -2.27330500 | -0.27167000 | 0.09372300  |
| N  | -0.32367300 | 0.59895400  | 0.13244700  |
| C  | -1.38283400 | 0.39233300  | -0.69890500 |
| C  | -0.55650300 | 0.10202300  | 1.41158700  |
| H  | 0.18575400  | 0.13187100  | 2.18910900  |
| C  | -1.80162900 | -0.43179600 | 1.39383100  |
| H  | -2.35997300 | -0.91482500 | 2.17631500  |
| C  | -3.63516000 | -0.54173600 | -0.40518400 |
| H  | -3.50176300 | -0.79039800 | -1.46293200 |
| C  | -4.40727600 | 0.80572300  | -0.36985600 |
| C  | 0.88575200  | 1.30991700  | -0.29914200 |
| H  | 0.72172500  | 1.54078400  | -1.35059300 |
| C  | 2.10443900  | 0.36745900  | -0.21205900 |
| O  | -3.81221700 | 1.78338700  | -1.06819000 |
| C  | 1.12104100  | 2.61740800  | 0.49672100  |
| H  | 1.24900200  | 2.33927500  | 1.54893700  |
| C  | -4.34592300 | -1.72314300 | 0.27607600  |
| H  | -4.53776000 | -1.45812300 | 1.32190400  |
| C  | -5.70298800 | -1.99756700 | -0.39521400 |
| H  | -6.17820500 | -2.86317000 | 0.07378800  |
| H  | -6.37827900 | -1.14847000 | -0.30856000 |
| H  | -5.56865500 | -2.23324500 | -1.45698600 |
| C  | -3.48432300 | -2.99663500 | 0.21916300  |
| H  | -3.29937900 | -3.28954100 | -0.81963700 |
| H  | -2.51550100 | -2.88337100 | 0.70737700  |
| H  | -4.01045600 | -3.82242100 | 0.70512300  |
| C  | -0.08275200 | 3.56050100  | 0.37553100  |
| H  | -0.24196600 | 3.86182800  | -0.66472900 |
| H  | -1.00489000 | 3.10066700  | 0.73484200  |
| H  | 0.08961300  | 4.46651600  | 0.96276000  |
| C  | 2.40696900  | 3.31371600  | 0.02845200  |
| H  | 3.29072900  | 2.68779200  | 0.17284700  |
| H  | 2.34953600  | 3.57352300  | -1.03335300 |
| H  | 2.55907300  | 4.23859000  | 0.59073400  |
| H  | -2.90143500 | 1.49687800  | -1.33841700 |

## C2

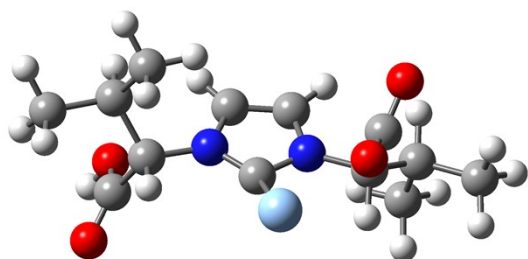

|    |             |             |             |
|----|-------------|-------------|-------------|
| Ag | 0.59994100  | -1.88237400 | -0.81233200 |
| O  | 3.07324900  | -0.35298100 | 2.06244200  |
| O  | -3.54247200 | 2.33630500  | -0.47157300 |
| O  | -3.80180700 | 0.78596900  | -2.08044000 |
| N  | 0.90468800  | 0.89554300  | 0.17292300  |
| N  | -1.24363700 | 0.70824600  | 0.18078400  |
| C  | -0.11163200 | 0.14156400  | -0.31525300 |
| C  | -0.93418400 | 1.80372600  | 0.98009600  |
| H  | -1.68415400 | 2.41628700  | 1.44650000  |
| C  | 0.41762300  | 1.90840400  | 0.98137400  |
| H  | 1.05627100  | 2.60884200  | 1.48821600  |
| C  | 2.33585400  | 0.53687900  | -0.04667000 |
| H  | 2.37809700  | 0.16143900  | -1.07189400 |
| C  | 2.68323500  | -0.65467900 | 0.93842500  |
| C  | -2.58581200 | 0.17430000  | -0.07565400 |
| H  | -2.43165300 | -0.74180400 | -0.64563100 |
| C  | -3.36843600 | 1.10455100  | -1.00529500 |
| O  | 2.50042600  | -1.82778900 | 0.45668900  |
| C  | -3.36010000 | -0.15313300 | 1.22713300  |
| H  | -3.46124200 | 0.77834800  | 1.79484600  |
| C  | 3.28374200  | 1.73894800  | 0.06544800  |
| H  | 3.22420900  | 2.12025800  | 1.09023400  |
| C  | 4.73029500  | 1.26905500  | -0.15968000 |
| H  | 5.41488400  | 2.11888200  | -0.09332100 |
| H  | 5.02888200  | 0.53308600  | 0.58675700  |
| H  | 4.84807300  | 0.82606900  | -1.15483900 |
| C  | 2.93286200  | 2.85395300  | -0.93382600 |
| H  | 3.03186400  | 2.49449600  | -1.96374900 |
| H  | 1.91591300  | 3.23453200  | -0.81406600 |
| H  | 3.61741100  | 3.69829600  | -0.81419600 |
| C  | -2.58471800 | -1.16610900 | 2.07921200  |
| H  | -2.48498800 | -2.12259600 | 1.55571000  |
| H  | -1.58419000 | -0.81430000 | 2.33643900  |
| H  | -3.12098400 | -1.35611300 | 3.01215300  |
| C  | -4.76930900 | -0.67113800 | 0.90460900  |
| H  | -5.37127500 | 0.06173200  | 0.36174100  |
| H  | -4.72656200 | -1.58270300 | 0.30044400  |
| H  | -5.29775700 | -0.91014600 | 1.83024100  |
| H  | -4.02905800 | 2.87049800  | -1.11840900 |



# C2D2O

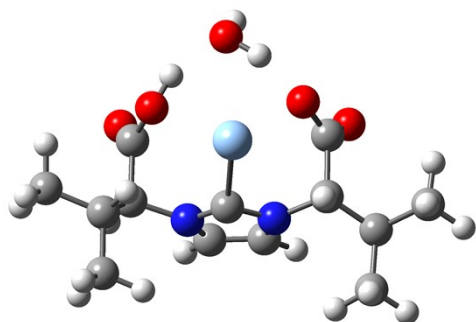

|          |             |             |             |
|----------|-------------|-------------|-------------|
| Ag       | -0.14628800 | -0.99952800 | -1.44737700 |
| O        | 2.83896400  | -1.20945900 | 1.61860000  |
| O        | -2.10145900 | -1.40285900 | 0.45580800  |
| O        | -2.73260600 | -0.62521100 | 2.47542100  |
| N        | 1.12930500  | 1.09360100  | 0.34138700  |
| N        | -0.98858700 | 1.33834000  | 0.66228500  |
| C        | -0.08055700 | 0.82135300  | -0.20531800 |
| C        | -0.34466900 | 1.92970800  | 1.74726900  |
| H        | -0.88359800 | 2.39348000  | 2.55560700  |
| C        | 0.98466300  | 1.77066600  | 1.54635900  |
| H        | 1.82046300  | 2.06716000  | 2.15390600  |
| C        | 2.35915300  | 0.39322600  | -0.11832400 |
| H        | 2.24653700  | 0.29409600  | -1.20071100 |
| C        | 2.28812400  | -1.04291400 | 0.53672400  |
| C        | -2.42300600 | 0.97192200  | 0.69036300  |
| H        | -2.89060000 | 1.63269300  | 1.42257700  |
| C        | -2.46829000 | -0.44213100 | 1.31391500  |
| O        | 1.58349500  | -1.90791300 | -0.10926800 |
| C        | -3.14264400 | 1.13056600  | -0.65939500 |
| H        | -2.63595200 | 0.49006500  | -1.38687200 |
| C        | 3.65036200  | 1.16460900  | 0.17860000  |
| H        | 3.76003800  | 1.23088100  | 1.26589900  |
| C        | 4.85414600  | 0.37011200  | -0.35229200 |
| H        | 5.78190100  | 0.90987900  | -0.14547100 |
| H        | 4.92207100  | -0.61069500 | 0.11915300  |
| H        | 4.78659800  | 0.23302700  | -1.43739400 |
| C        | 3.62957800  | 2.57565400  | -0.42967300 |
| H        | 3.54990700  | 2.52747600  | -1.52110200 |
| H        | 2.79783600  | 3.18191300  | -0.06365900 |
| H        | 4.55605400  | 3.10509100  | -0.19123400 |
| C        | -3.06857100 | 2.58119100  | -1.15287900 |
| H        | -3.56856700 | 3.26017900  | -0.45382200 |
| H        | -2.03694500 | 2.91677800  | -1.27490800 |
| H        | -3.56833300 | 2.67678200  | -2.12017000 |
| C        | -4.59917400 | 0.66059500  | -0.53157000 |
| H        | -4.66742400 | -0.38957100 | -0.23766200 |
| H        | -5.14401500 | 1.25591600  | 0.20850400  |
| H        | -5.11477300 | 0.77060000  | -1.48868700 |
| H        | -1.66485500 | -2.17658700 | 0.92475900  |
| O        | -0.37533400 | -3.20464000 | 1.24626400  |
| H(Iso=2) | 0.46317000  | -2.84930500 | 0.85067500  |
| H(Iso=2) | -0.15814300 | -3.47229700 | 2.14438400  |

## TS2

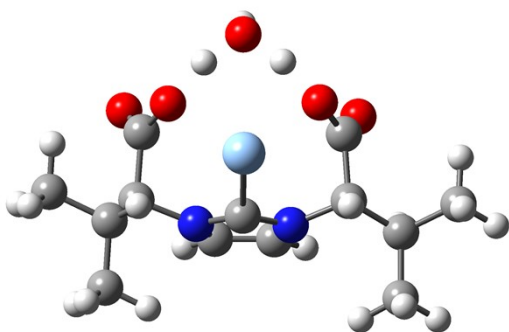

|          |             |             |             |
|----------|-------------|-------------|-------------|
| Ag       | -0.39095800 | -0.88269900 | -1.49377000 |
| O        | 2.72875800  | -1.23313300 | 1.64235600  |
| O        | -1.91264300 | -1.46631900 | 0.43279800  |
| O        | -2.52165100 | -0.76289700 | 2.47443400  |
| N        | 1.21818400  | 1.11064700  | 0.29842300  |
| N        | -0.89230500 | 1.34258400  | 0.69024200  |
| C        | -0.01110300 | 0.86238100  | -0.21905100 |
| C        | -0.21553900 | 1.90101500  | 1.77204200  |
| H        | -0.73130700 | 2.33604200  | 2.61087100  |
| C        | 1.10777600  | 1.75014300  | 1.53048200  |
| H        | 1.96028600  | 2.02685600  | 2.12411300  |
| C        | 2.40159100  | 0.33884400  | -0.16398200 |
| H        | 2.26480800  | 0.21067600  | -1.23971400 |
| C        | 2.24032700  | -1.05120300 | 0.53948200  |
| C        | -2.31267800 | 0.91375300  | 0.77045500  |
| H        | -2.75563000 | 1.50587300  | 1.57305400  |
| C        | -2.28102900 | -0.55935400 | 1.29583100  |
| O        | 1.47629600  | -1.89054300 | -0.10310400 |
| C        | -3.11525100 | 1.14986700  | -0.51831600 |
| H        | -2.64545000 | 0.57449500  | -1.32322200 |
| C        | 3.74084800  | 1.03321400  | 0.10438300  |
| H        | 3.86640000  | 1.11517600  | 1.18889400  |
| C        | 4.88683300  | 0.15598300  | -0.42379600 |
| H        | 5.84934300  | 0.63570400  | -0.22916000 |
| H        | 4.89769000  | -0.82261500 | 0.05854800  |
| H        | 4.80318000  | 0.00962000  | -1.50634400 |
| C        | 3.79345300  | 2.43193600  | -0.52807100 |
| H        | 3.69489800  | 2.37131500  | -1.61719800 |
| H        | 3.00220100  | 3.08861700  | -0.15963700 |
| H        | 4.75205400  | 2.91020700  | -0.31028900 |
| C        | -3.10846100 | 2.63197000  | -0.91528200 |
| H        | -3.57764300 | 3.24661000  | -0.13936900 |
| H        | -2.09500900 | 3.00524800  | -1.07714200 |
| H        | -3.67224000 | 2.78133600  | -1.83997700 |
| C        | -4.54812000 | 0.62859600  | -0.33623300 |
| H        | -4.56504900 | -0.43933400 | -0.10799900 |
| H        | -5.05913600 | 1.15614100  | 0.47582300  |
| H        | -5.12638900 | 0.78649600  | -1.25020600 |
| H        | -1.10707100 | -2.38149200 | 0.92477400  |
| O        | -0.23325700 | -3.05201800 | 1.16631900  |
| H(Iso=2) | 0.66092100  | -2.60083500 | 0.66017000  |
| H(Iso=2) | -0.09489700 | -3.08551100 | 2.12043900  |

# C3<sub>HDO</sub>

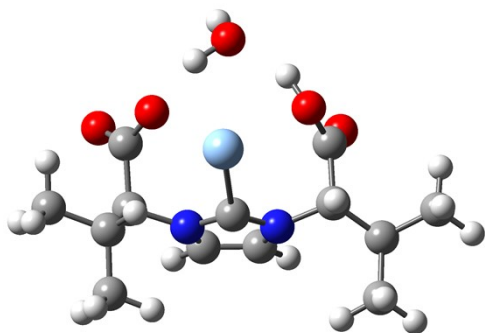

|          |             |             |             |
|----------|-------------|-------------|-------------|
| Ag       | -0.60748400 | -0.85896500 | -1.45412300 |
| O        | 2.92307300  | -1.29003600 | 1.59970500  |
| O        | -2.03405400 | -1.48539700 | 0.30415100  |
| O        | -2.85467900 | -0.86585500 | 2.29753000  |
| N        | 1.30602500  | 1.02227600  | 0.35156500  |
| N        | -0.79775900 | 1.23069300  | 0.77638600  |
| C        | 0.06873800  | 0.78127000  | -0.15945900 |
| C        | -0.11185300 | 1.75495800  | 1.86600100  |
| H        | -0.62006400 | 2.16360700  | 2.72254600  |
| C        | 1.20985300  | 1.61755400  | 1.60748800  |
| H        | 2.06786900  | 1.87730500  | 2.20100000  |
| C        | 2.50170600  | 0.32159000  | -0.16956800 |
| H        | 2.32381900  | 0.19020600  | -1.23822500 |
| C        | 2.43703100  | -1.06204900 | 0.52114700  |
| C        | -2.24823000 | 0.90536900  | 0.81358900  |
| H        | -2.64354100 | 1.45254800  | 1.67049200  |
| C        | -2.40751700 | -0.62034800 | 1.18278800  |
| O        | 1.68325200  | -1.91825000 | -0.17987700 |
| C        | -3.01049700 | 1.35669300  | -0.44501500 |
| H        | -2.58202600 | 0.83732000  | -1.31076500 |
| C        | 3.82032600  | 1.07218000  | 0.05256200  |
| H        | 3.98459800  | 1.15807500  | 1.13172900  |
| C        | 4.98374800  | 0.25301200  | -0.52828800 |
| H        | 5.92869300  | 0.77808600  | -0.37010400 |
| H        | 5.06674900  | -0.72732000 | -0.05530500 |
| H        | 4.86264000  | 0.10805700  | -1.60719800 |
| C        | 3.77678400  | 2.47484600  | -0.57001100 |
| H        | 3.63666800  | 2.41641500  | -1.65446000 |
| H        | 2.96965000  | 3.08677100  | -0.16226700 |
| H        | 4.71857200  | 2.99822100  | -0.38669100 |
| C        | -2.87127200 | 2.86741700  | -0.67608300 |
| H        | -3.30082700 | 3.43078800  | 0.15938500  |
| H        | -1.82761500 | 3.16980800  | -0.78823800 |
| H        | -3.40425800 | 3.16558500  | -1.58307800 |
| C        | -4.48603900 | 0.94656800  | -0.33329500 |
| H        | -4.59889300 | -0.13479000 | -0.23323500 |
| H        | -4.95846200 | 1.41453500  | 0.53630400  |
| H        | -5.03513000 | 1.26476500  | -1.22343000 |
| H        | -0.96314900 | -2.75180400 | 0.88184500  |
| O        | -0.16676500 | -3.32236100 | 1.03483500  |
| H(Iso=2) | 1.23011500  | -2.59444300 | 0.40483600  |
| H(Iso=2) | -0.24480700 | -3.66233600 | 1.93107600  |

**C2<sub>d</sub>**

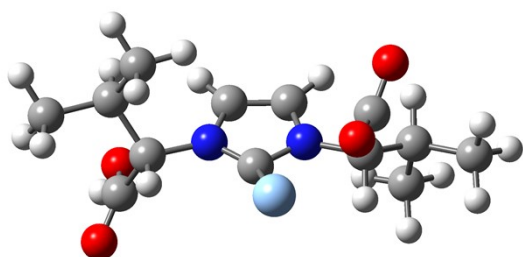

|           |             |             |             |
|-----------|-------------|-------------|-------------|
| Ag        | 0.59994100  | -1.88237400 | -0.81233200 |
| O         | 3.07324900  | -0.35298100 | 2.06244200  |
| O         | -3.54247200 | 2.33630500  | -0.47157300 |
| O         | -3.80180700 | 0.78596900  | -2.08044000 |
| N         | 0.90468800  | 0.89554300  | 0.17292300  |
| N         | -1.24363700 | 0.70824600  | 0.18078400  |
| C         | -0.11163200 | 0.14156400  | -0.31525300 |
| C         | -0.93418400 | 1.80372600  | 0.98009600  |
| H         | -1.68415400 | 2.41628700  | 1.44650000  |
| C         | 0.41762300  | 1.90840400  | 0.98137400  |
| H         | 1.05627100  | 2.60884200  | 1.48821600  |
| C         | 2.33585400  | 0.53687900  | -0.04667000 |
| H         | 2.37809700  | 0.16143900  | -1.07189400 |
| C         | 2.68323500  | -0.65467900 | 0.93842500  |
| C         | -2.58581200 | 0.17430000  | -0.07565400 |
| H         | -2.43165300 | -0.74180400 | -0.64563100 |
| C         | -3.36843600 | 1.10455100  | -1.00529500 |
| O         | 2.50042600  | -1.82778900 | 0.45668900  |
| C         | -3.36010000 | -0.15313300 | 1.22713300  |
| H         | -3.46124200 | 0.77834800  | 1.79484600  |
| C         | 3.28374200  | 1.73894800  | 0.06544800  |
| H         | 3.22420900  | 2.12025800  | 1.09023400  |
| C         | 4.73029500  | 1.26905500  | -0.15968000 |
| H         | 5.41488400  | 2.11888200  | -0.09332100 |
| H         | 5.02888200  | 0.53308600  | 0.58675700  |
| H         | 4.84807300  | 0.82606900  | -1.15483900 |
| C         | 2.93286200  | 2.85395300  | -0.93382600 |
| H         | 3.03186400  | 2.49449600  | -1.96374900 |
| H         | 1.91591300  | 3.23453200  | -0.81406600 |
| H         | 3.61741100  | 3.69829600  | -0.81419600 |
| C         | -2.58471800 | -1.16610900 | 2.07921200  |
| H         | -2.48498800 | -2.12259600 | 1.55571000  |
| H         | -1.58419000 | -0.81430000 | 2.33643900  |
| H         | -3.12098400 | -1.35611300 | 3.01215300  |
| C         | -4.76930900 | -0.67113800 | 0.90460900  |
| H         | -5.37127500 | 0.06173200  | 0.36174100  |
| H         | -4.72656200 | -1.58270300 | 0.30044400  |
| H         | -5.29775700 | -0.91014600 | 1.83024100  |
| H (Iso=2) | -4.02905800 | 2.87049800  | -1.11840900 |

# C1<sub>D</sub>

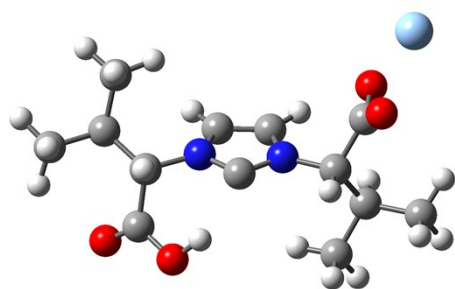

|          |             |             |             |
|----------|-------------|-------------|-------------|
| Ag       | 4.17890400  | -1.30356100 | -0.11731300 |
| O        | -5.44725200 | 0.98061400  | 0.20950400  |
| O        | 2.40259500  | -0.12066000 | 0.91391000  |
| O        | 2.74623900  | 0.14123300  | -1.27292000 |
| N        | -2.27339600 | -0.27161400 | 0.09376700  |
| N        | -0.32373600 | 0.59895000  | 0.13251900  |
| C        | -1.38286200 | 0.39230000  | -0.69887300 |
| C        | -0.55664500 | 0.10213300  | 1.41168800  |
| H        | 0.18561100  | 0.13191300  | 2.18921000  |
| C        | -1.80167800 | -0.43190300 | 1.39384000  |
| H        | -2.36004300 | -0.91491400 | 2.17631000  |
| C        | -3.63526700 | -0.54168900 | -0.40516300 |
| H        | -3.50187400 | -0.79032400 | -1.46292100 |
| C        | -4.40727200 | 0.80586100  | -0.36985500 |
| C        | 0.88575200  | 1.30982600  | -0.29909600 |
| H        | 0.72173700  | 1.54062100  | -1.35056100 |
| C        | 2.10440500  | 0.36731600  | -0.21198900 |
| O        | -3.81193200 | 1.78333300  | -1.06806200 |
| C        | 1.12111400  | 2.61734900  | 0.49665400  |
| H        | 1.24924500  | 2.33928700  | 1.54886700  |
| C        | -4.34604500 | -1.72314200 | 0.27601200  |
| H        | -4.53786100 | -1.45817100 | 1.32185200  |
| C        | -5.70310400 | -1.99757600 | -0.39535600 |
| H        | -6.17851800 | -2.86293900 | 0.07390200  |
| H        | -6.37830600 | -1.14838000 | -0.30907700 |
| H        | -5.56862100 | -2.23365400 | -1.45701200 |
| C        | -3.48451700 | -2.99668000 | 0.21893600  |
| H        | -3.29957400 | -3.28945000 | -0.81990800 |
| H        | -2.51567900 | -2.88361700 | 0.70716900  |
| H        | -4.01073500 | -3.82249500 | 0.70475300  |
| C        | -0.08277100 | 3.56033900  | 0.37561600  |
| H        | -0.24215700 | 3.86163800  | -0.66462700 |
| H        | -1.00482000 | 3.10042500  | 0.73506500  |
| H        | 0.08959300  | 4.46637800  | 0.96280600  |
| C        | 2.40693800  | 3.31371600  | 0.02815100  |
| H        | 3.29075600  | 2.68785000  | 0.17244000  |
| H        | 2.34932800  | 3.57345600  | -1.03366000 |
| H        | 2.55907200  | 4.23863100  | 0.59035600  |
| H(Iso=2) | -2.90121600 | 1.49648600  | -1.33812500 |

# TS1<sub>D</sub>

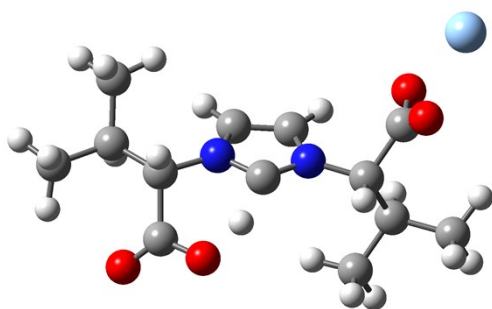

|          |             |             |             |
|----------|-------------|-------------|-------------|
| Ag       | 4.25603600  | -1.23066400 | -0.22677400 |
| O        | -5.26425100 | 1.27301100  | -0.37641700 |
| O        | 2.45205600  | -0.20581700 | 0.89972500  |
| O        | 2.73173900  | 0.22777600  | -1.26981000 |
| N        | -2.28730400 | -0.40406700 | 0.12542900  |
| N        | -0.31631000 | 0.46246300  | 0.21069200  |
| C        | -1.41060700 | 0.34999600  | -0.57384800 |
| C        | -0.50808200 | -0.21360200 | 1.40996800  |
| H        | 0.26313800  | -0.28616200 | 2.15542800  |
| C        | -1.75662900 | -0.74731600 | 1.36053400  |
| H        | -2.28046000 | -1.33391200 | 2.09219000  |
| C        | -3.66326200 | -0.57391600 | -0.43117400 |
| H        | -3.52493200 | -1.06409900 | -1.40114300 |
| C        | -4.18321300 | 0.88228300  | -0.77341100 |
| C        | 0.86222200  | 1.25802400  | -0.16485700 |
| H        | 0.67759300  | 1.58560700  | -1.18720900 |
| C        | 2.11183100  | 0.35270700  | -0.18159900 |
| O        | -3.35334600 | 1.55009400  | -1.51917300 |
| C        | 1.05891800  | 2.48913900  | 0.75364900  |
| H        | 1.23310300  | 2.11095000  | 1.76719600  |
| C        | -4.56146700 | -1.48502300 | 0.42047600  |
| H        | -4.62657900 | -1.06537300 | 1.43144400  |
| C        | -5.98880500 | -1.56396400 | -0.15128200 |
| H        | -6.56863900 | -2.29557000 | 0.41865700  |
| H        | -6.49037300 | -0.60107800 | -0.11389800 |
| H        | -5.96745700 | -1.90281500 | -1.19330000 |
| C        | -3.99327500 | -2.91804500 | 0.48631100  |
| H        | -4.02945500 | -3.38021800 | -0.50588000 |
| H        | -2.96059800 | -2.97590600 | 0.83282000  |
| H        | -4.60320100 | -3.53250000 | 1.15405800  |
| C        | -0.18970500 | 3.38029000  | 0.76051000  |
| H        | -0.40750000 | 3.76505000  | -0.24057500 |
| H        | -1.07629800 | 2.84992900  | 1.11262500  |
| H        | -0.03201500 | 4.23754400  | 1.42025800  |
| C        | 2.29710100  | 3.28688000  | 0.32059600  |
| H        | 3.21151000  | 2.69122600  | 0.37312200  |
| H        | 2.19071800  | 3.65165400  | -0.70583900 |
| H        | 2.42784100  | 4.15504400  | 0.97113200  |
| H(Iso=2) | -2.22453600 | 1.07784000  | -1.36538600 |

2c<sub>D</sub>

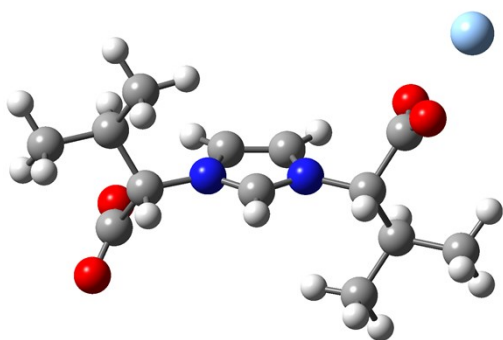

|           |             |             |             |
|-----------|-------------|-------------|-------------|
| Ag        | 4.22317600  | -1.26807800 | 0.20138300  |
| O         | -4.60773700 | 0.45993100  | 1.73833300  |
| O         | 2.39309500  | 0.05504100  | 0.90544200  |
| O         | 2.75602600  | -0.14591200 | -1.28692900 |
| N         | -2.38150300 | -0.02204400 | 0.03783600  |
| N         | -0.30928200 | 0.65625600  | -0.04437500 |
| C         | -1.42106400 | 0.42870200  | -0.76631200 |
| C         | -0.58304100 | 0.33280800  | 1.27494900  |
| H         | 0.16886000  | 0.41414400  | 2.03828100  |
| C         | -1.87770100 | -0.08865000 | 1.32467300  |
| H         | -2.52553100 | -0.35848300 | 2.14075200  |
| C         | -3.77990600 | -0.30919900 | -0.36683500 |
| H         | -3.85291500 | -0.00380400 | -1.41280800 |
| C         | -4.75545400 | 0.60701300  | 0.50667600  |
| C         | 0.92877000  | 1.24391600  | -0.58550800 |
| H         | 0.79687300  | 1.28691900  | -1.66729400 |
| C         | 2.11792900  | 0.30142700  | -0.30037700 |
| O         | -5.52111100 | 1.31019400  | -0.16437200 |
| C         | 1.18089100  | 2.67017600  | -0.03603600 |
| H         | 1.30660500  | 2.57560700  | 1.04772900  |
| C         | -4.10277100 | -1.80907500 | -0.22257800 |
| H         | -4.00346000 | -2.05357000 | 0.84089100  |
| C         | -5.56102800 | -2.06448800 | -0.62965100 |
| H         | -5.80460300 | -3.12383200 | -0.50913900 |
| H         | -6.25410600 | -1.47989500 | -0.02364700 |
| H         | -5.72839000 | -1.79662600 | -1.67802900 |
| C         | -3.14664000 | -2.69667100 | -1.03267500 |
| H         | -3.22077200 | -2.47865200 | -2.10436200 |
| H         | -2.10228100 | -2.56886600 | -0.73202900 |
| H         | -3.39706400 | -3.75250300 | -0.89602200 |
| C         | -0.00792200 | 3.59651600  | -0.32131500 |
| H         | -0.17370100 | 3.70787500  | -1.39831600 |
| H         | -0.93498800 | 3.24006100  | 0.13231300  |
| H         | 0.19075100  | 4.59150200  | 0.08382200  |
| C         | 2.47796900  | 3.24300100  | -0.62426500 |
| H         | 3.34887800  | 2.63293600  | -0.37456000 |
| H         | 2.41897000  | 3.31596600  | -1.71487100 |
| H         | 2.65241700  | 4.24740300  | -0.23194700 |
| H (Iso=2) | -1.52169300 | 0.59710200  | -1.82425500 |
